# Supplementary material for: Rapid Metabolome and Bioactivity Profiling of Fungi Associated with the Leaf and Rhizosphere of the Baltic Seagrass Zostera marina
Source: PubMed Central journal article supplement (PMC6669648; doi:10.3390/md17070419), 2019-07-19
Supplement: marinedrugs-17-00419-s001.pdf [file marinedrugs-17-00419-s001.pdf]

## SUPPLEMENTARY MATERIALS

# Rapid Metabolome and Bioactivity Profiling of Fungi Associated with Phyllosphere and Rhizosphere of Baltic Seagrass *Zostera marina*

Lars-Erik Petersen<sup>1</sup>, Michael Marner<sup>1</sup>, Antje Labes<sup>1</sup> and Deniz Tasdemir<sup>1,2,\*</sup>

<sup>1</sup> GEOMAR Centre for Marine Biotechnology (GEOMAR-Biotech), Research Unit Marine Natural Products Chemistry, GEOMAR Helmholtz Centre for Ocean Research Kiel, Am Kiel-Kanal 44, 24106 Kiel, Germany; lars-erik.petersen@uni-oldenburg.de; michael.marner@ime.fraunhofer.de; antje.labes@hs-flensburg.de

<sup>2</sup> Faculty of Mathematics and Natural Sciences, Kiel University, Christian-Albrechts-Platz 4, 24118 Kiel, Germany

\* Correspondence: dtasdemir@geomar.de; Tel.: +49-431-600-4430; ORCID ID: 0000-0002-7841-6271

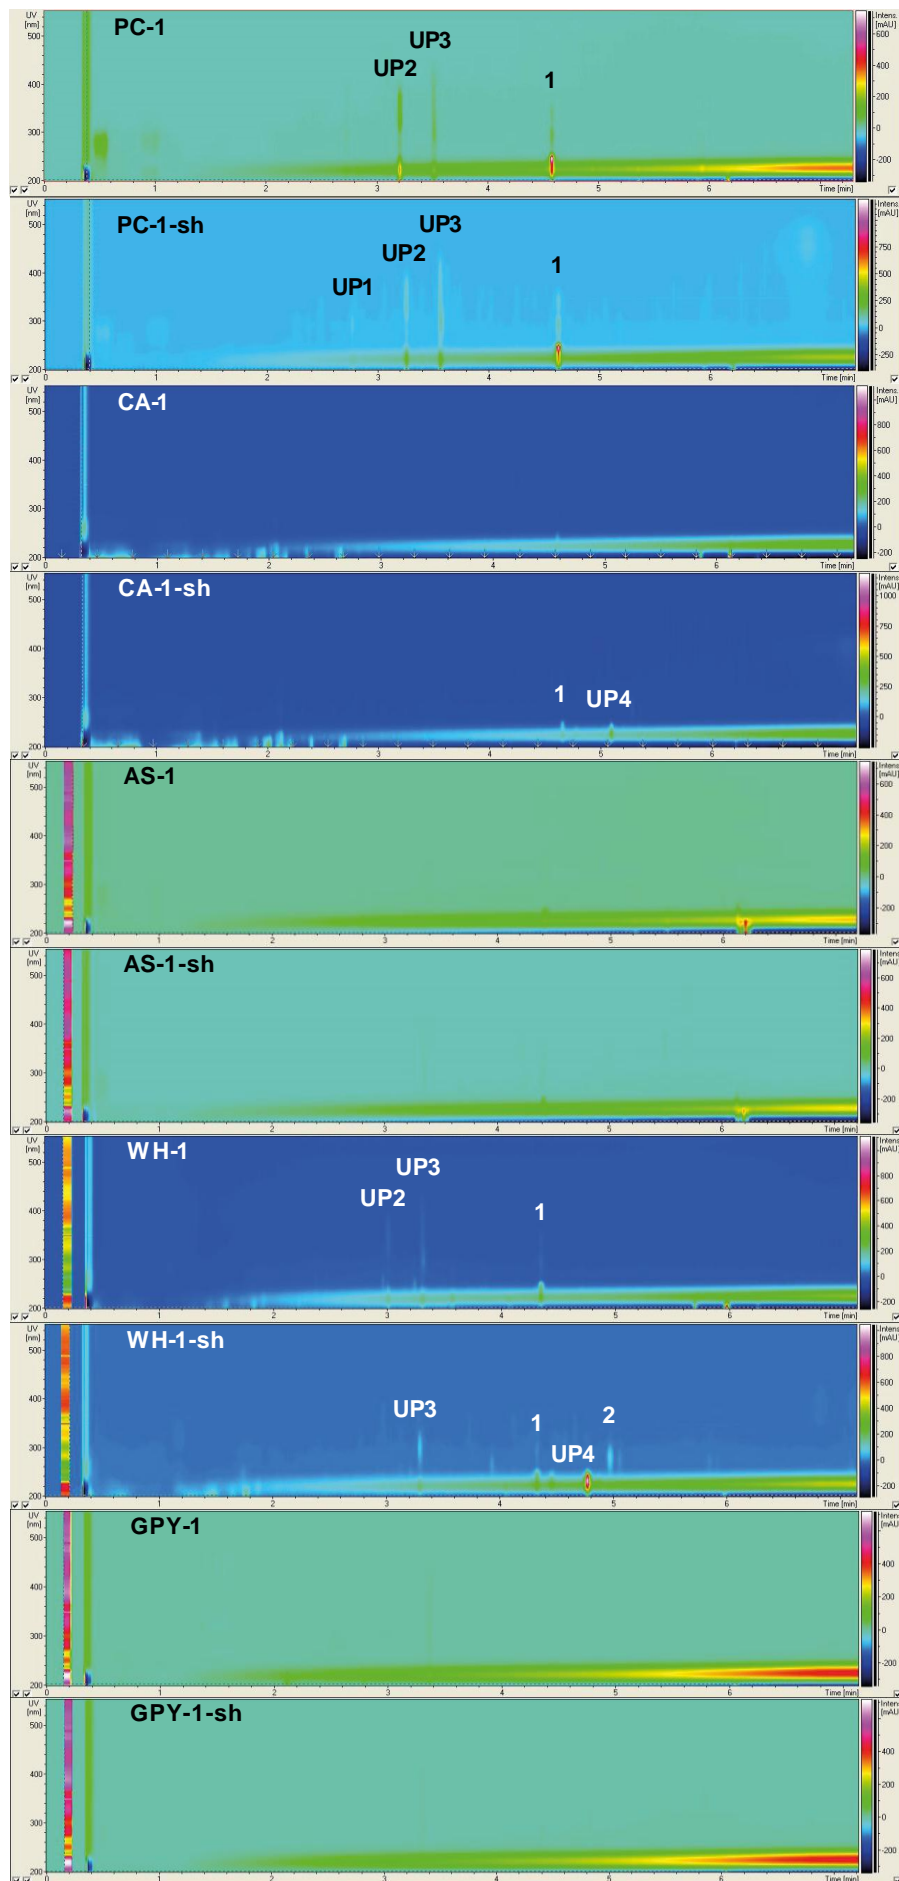

**Figure S1.** Metabolite profile of strain 1 (*Phoma macrostoma*) cultured under static and shaking (sh) conditions in five different media. Compounds are displayed as a function of UV absorption (nm) and intensity (mAU) vs. retention time (min). PC: potato-carrot medium, CA: casamino acids medium, AS: artificial seawater medium, WH: Wickerham's medium, GPY: glucose-peptone-yeast medium.

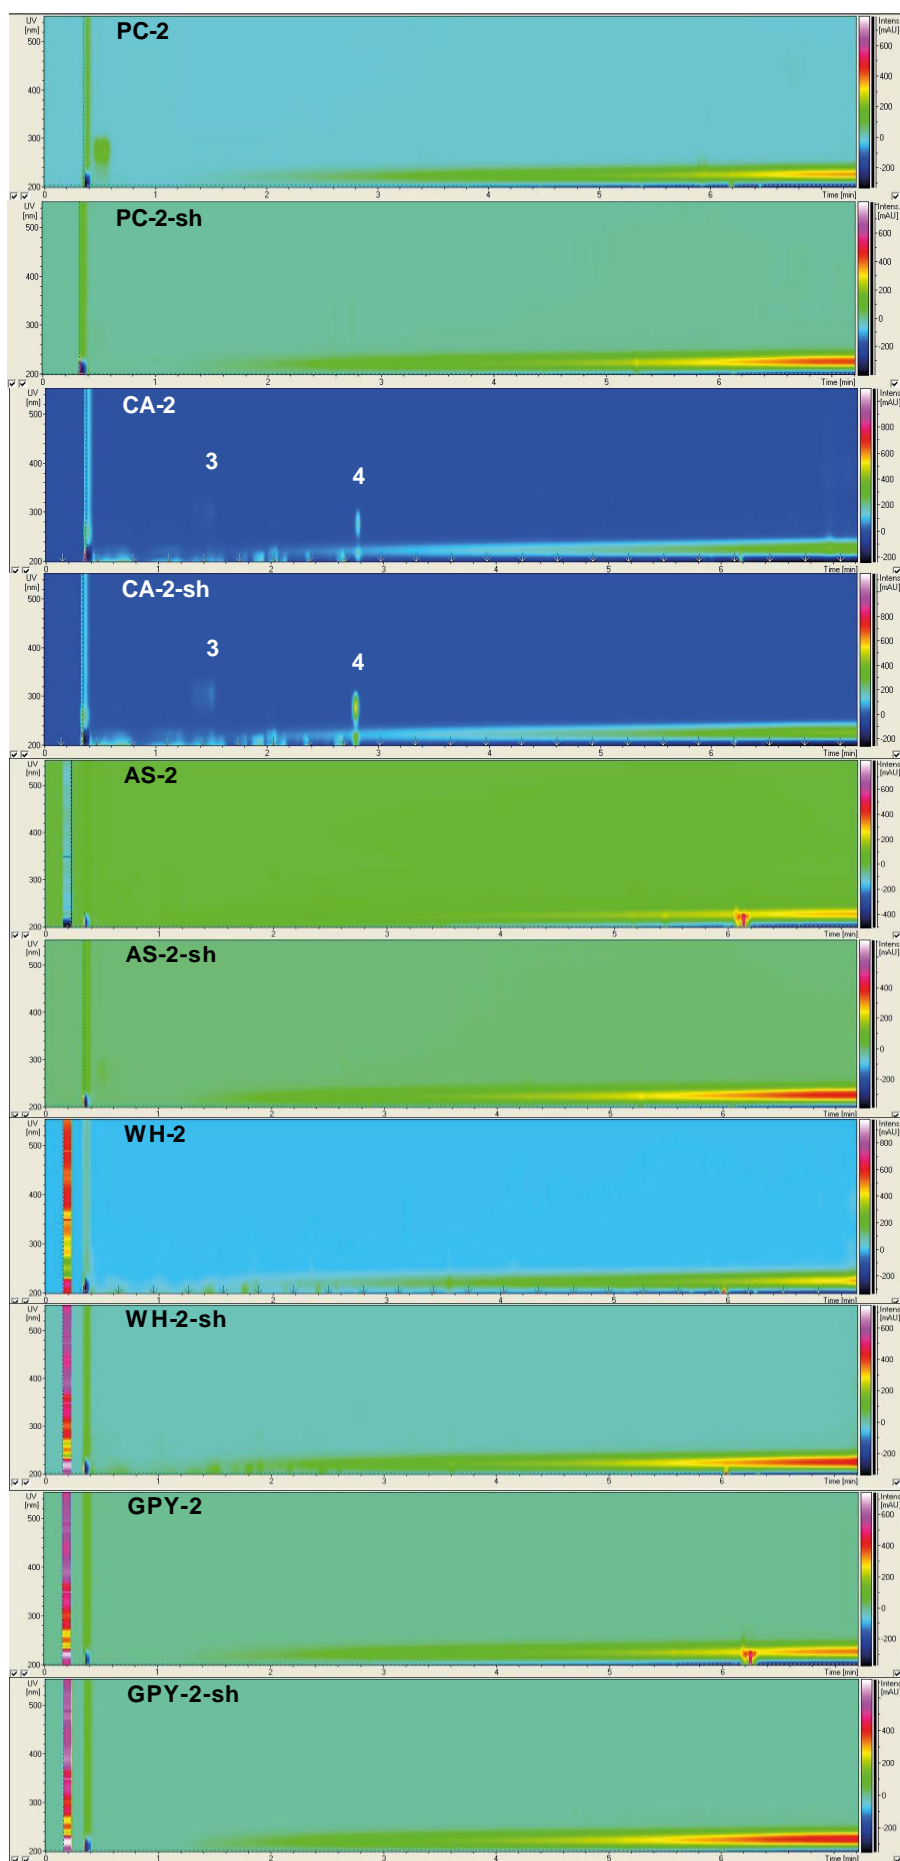

**Figure S2.** Metabolite profile of strain 2 (*Cladosporium langeronii*) cultured under static and shaking (sh) conditions in five different media.

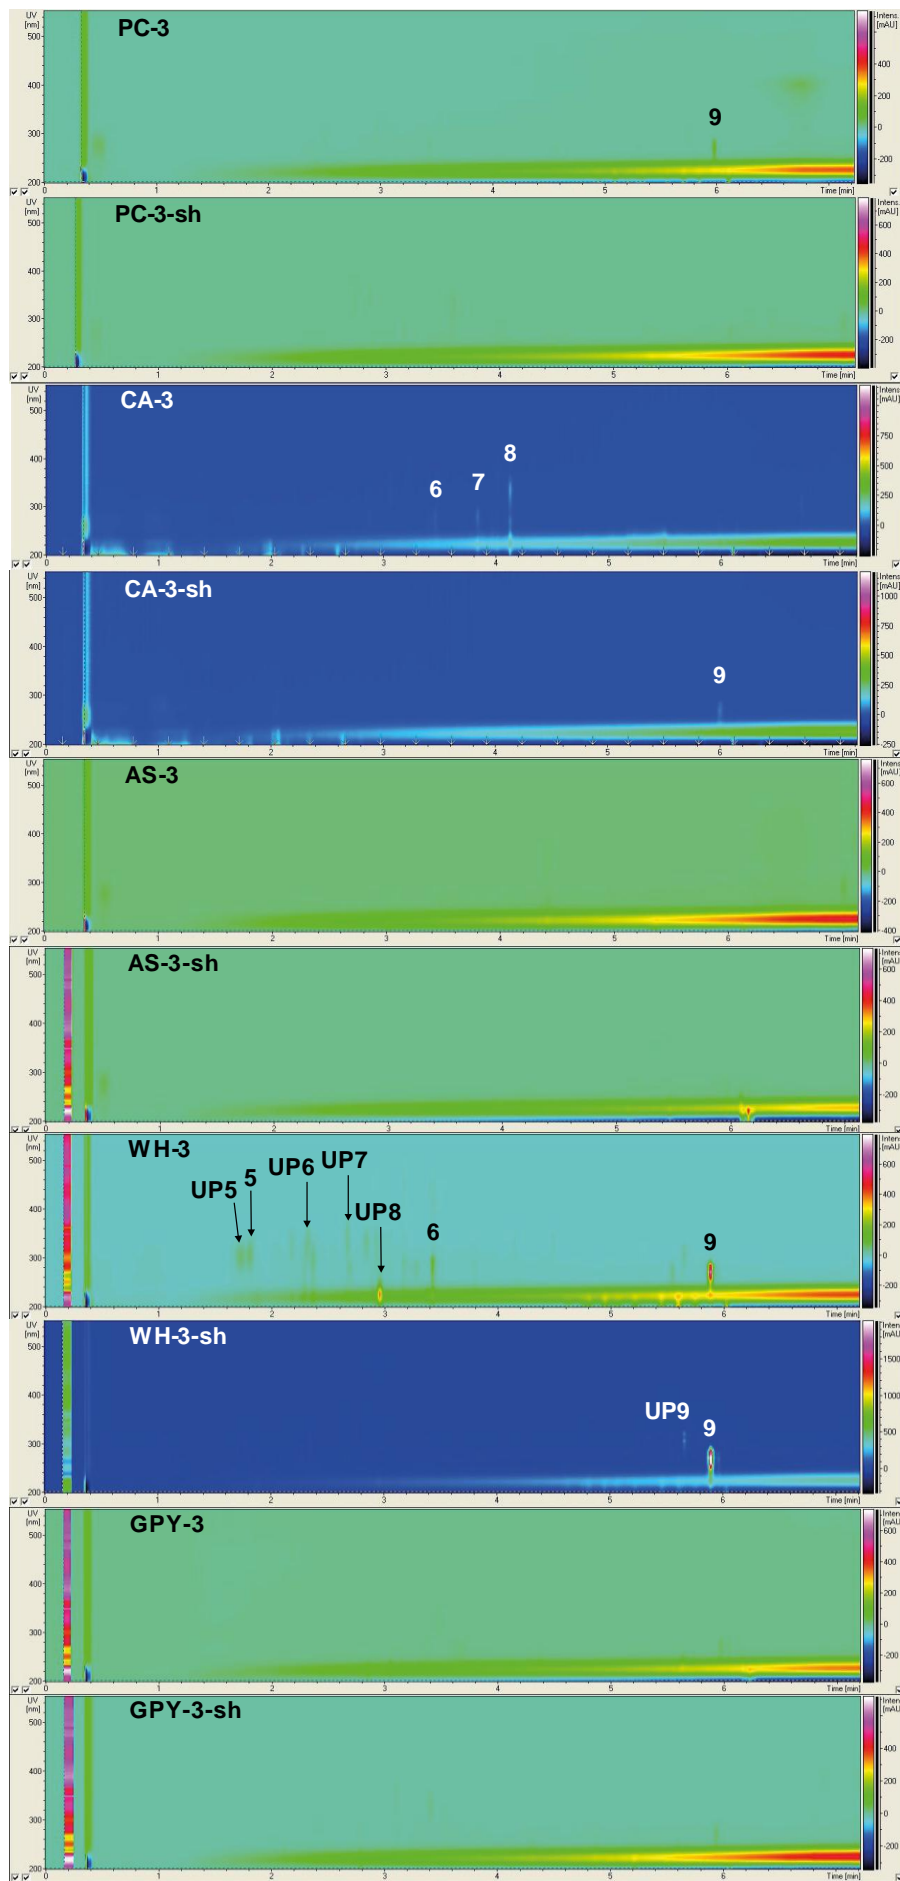

**Figure S3.** Metabolite profile of strain 3 (*Trichoderma harzianum*) cultured under static and shaking (sh) conditions in five different media.

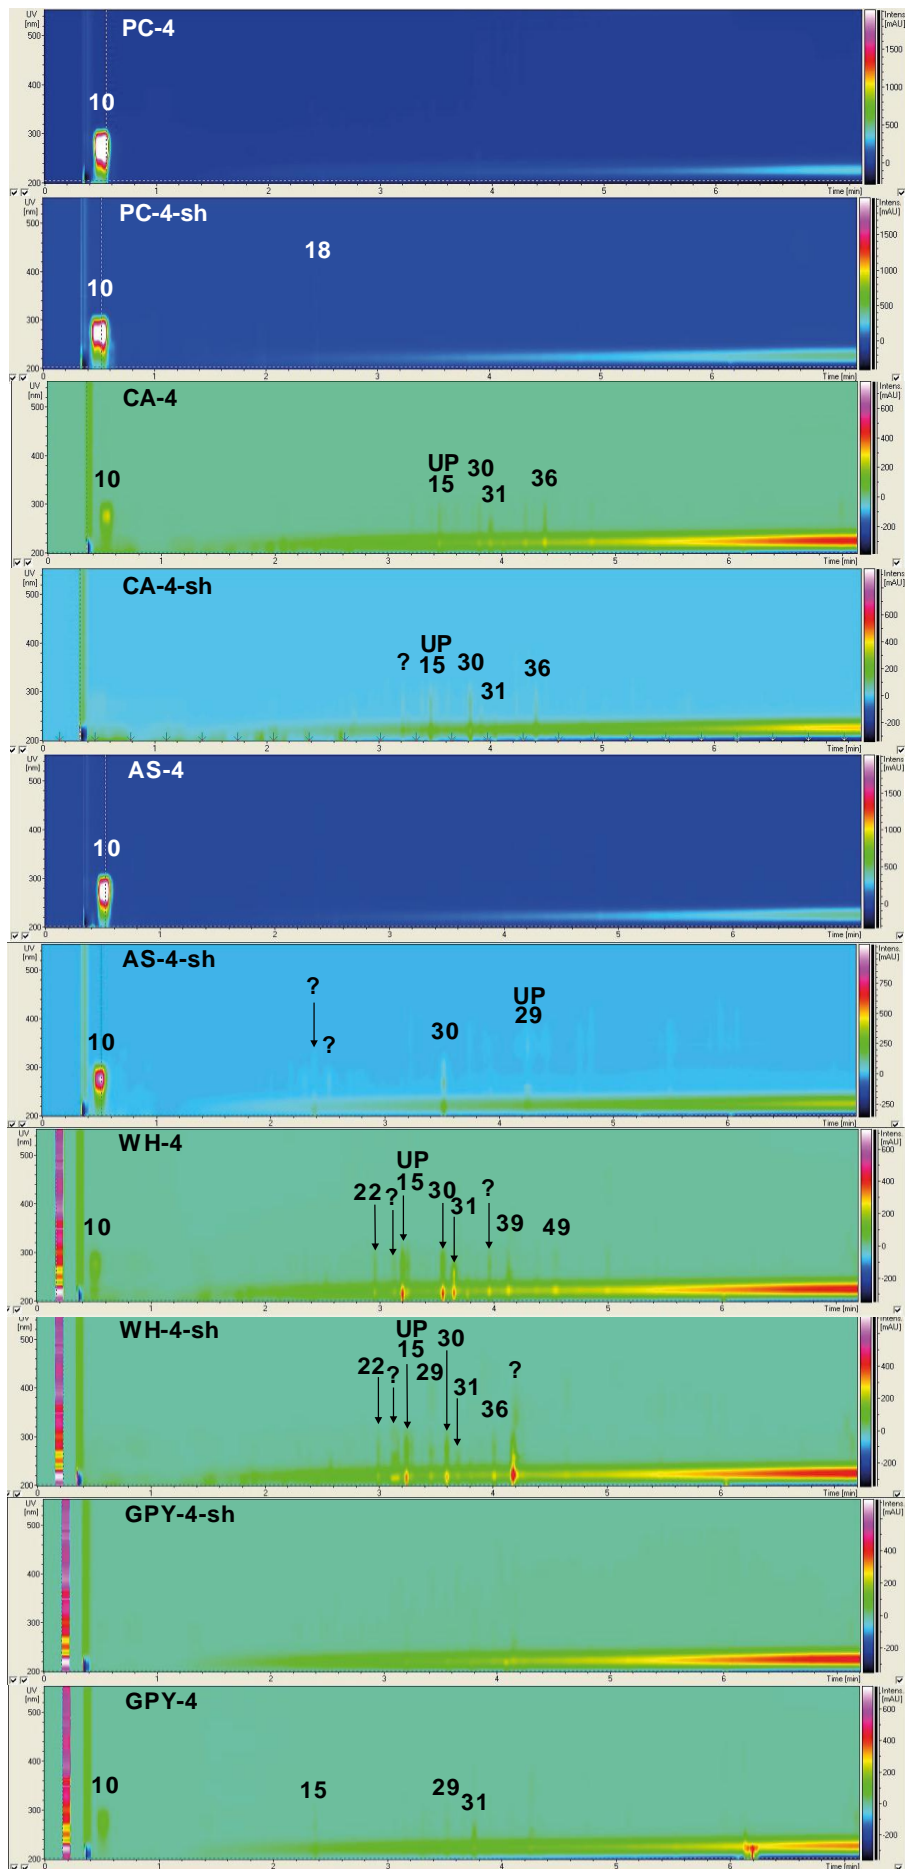

Figure S4. Metabolite profile of strain 4 (*Penicillium antarcticum*) cultured under static and shaking (sh) conditions in five different media.

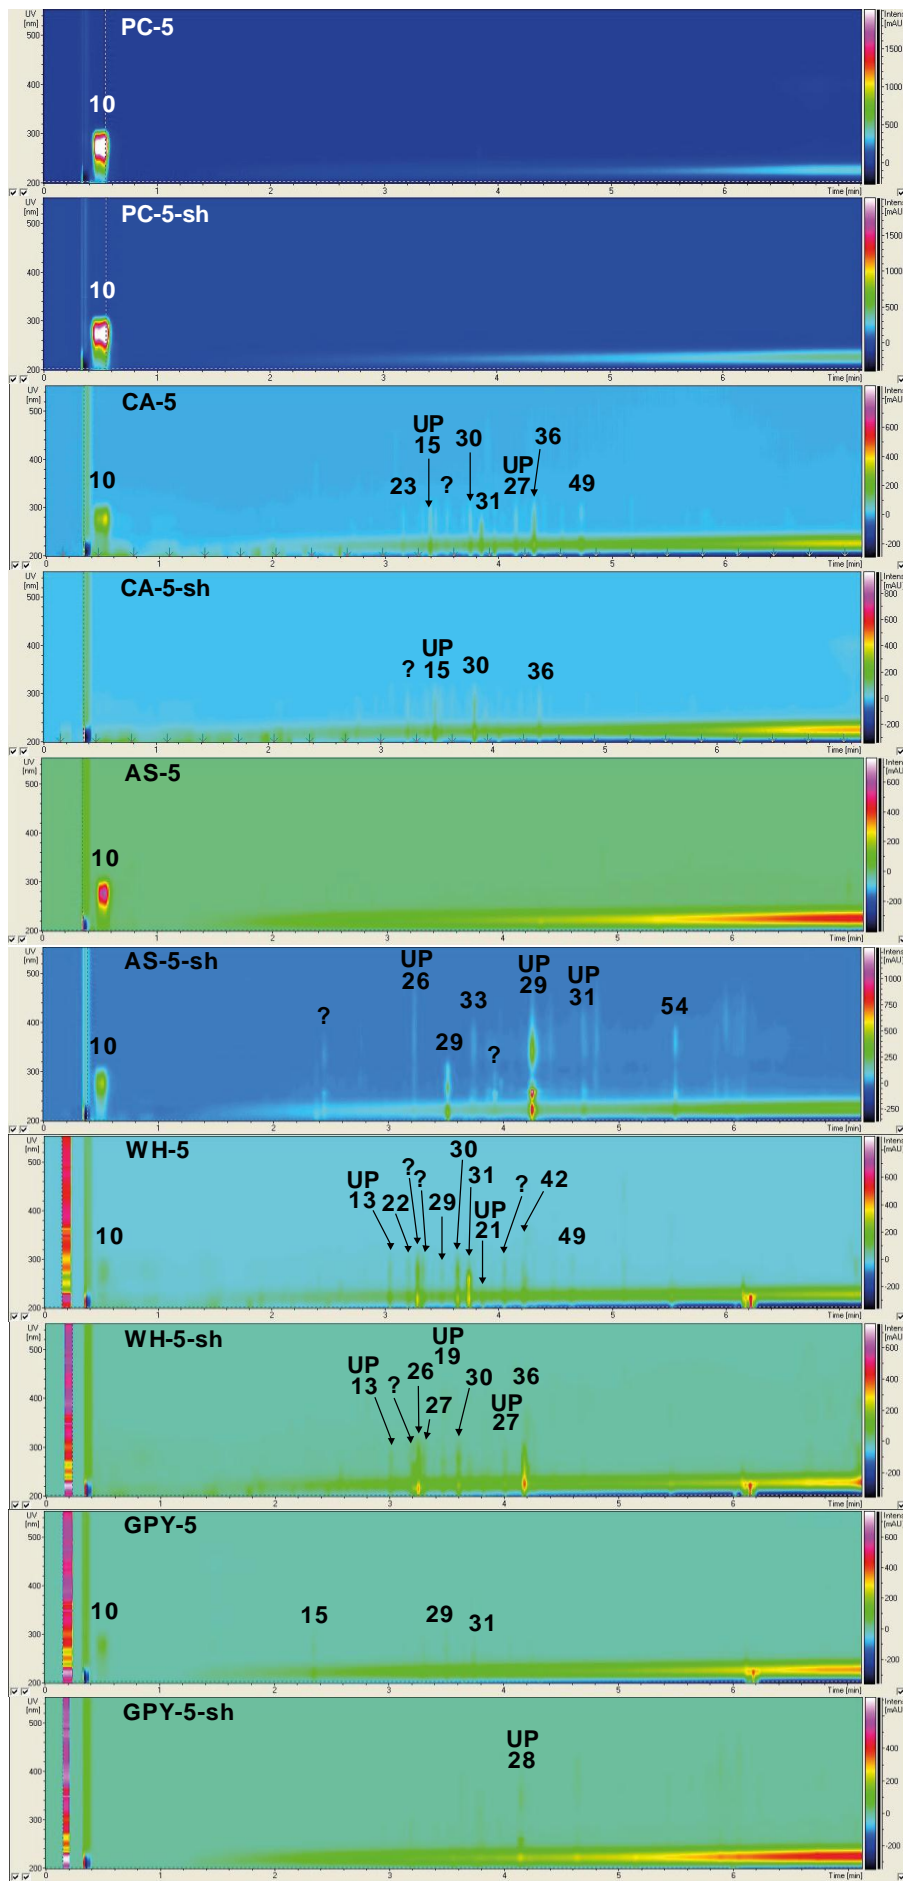

Figure S5. Metabolite profile of strain 5 (*P. antarcticum*) cultured under static and shaking (sh) conditions in five different media.

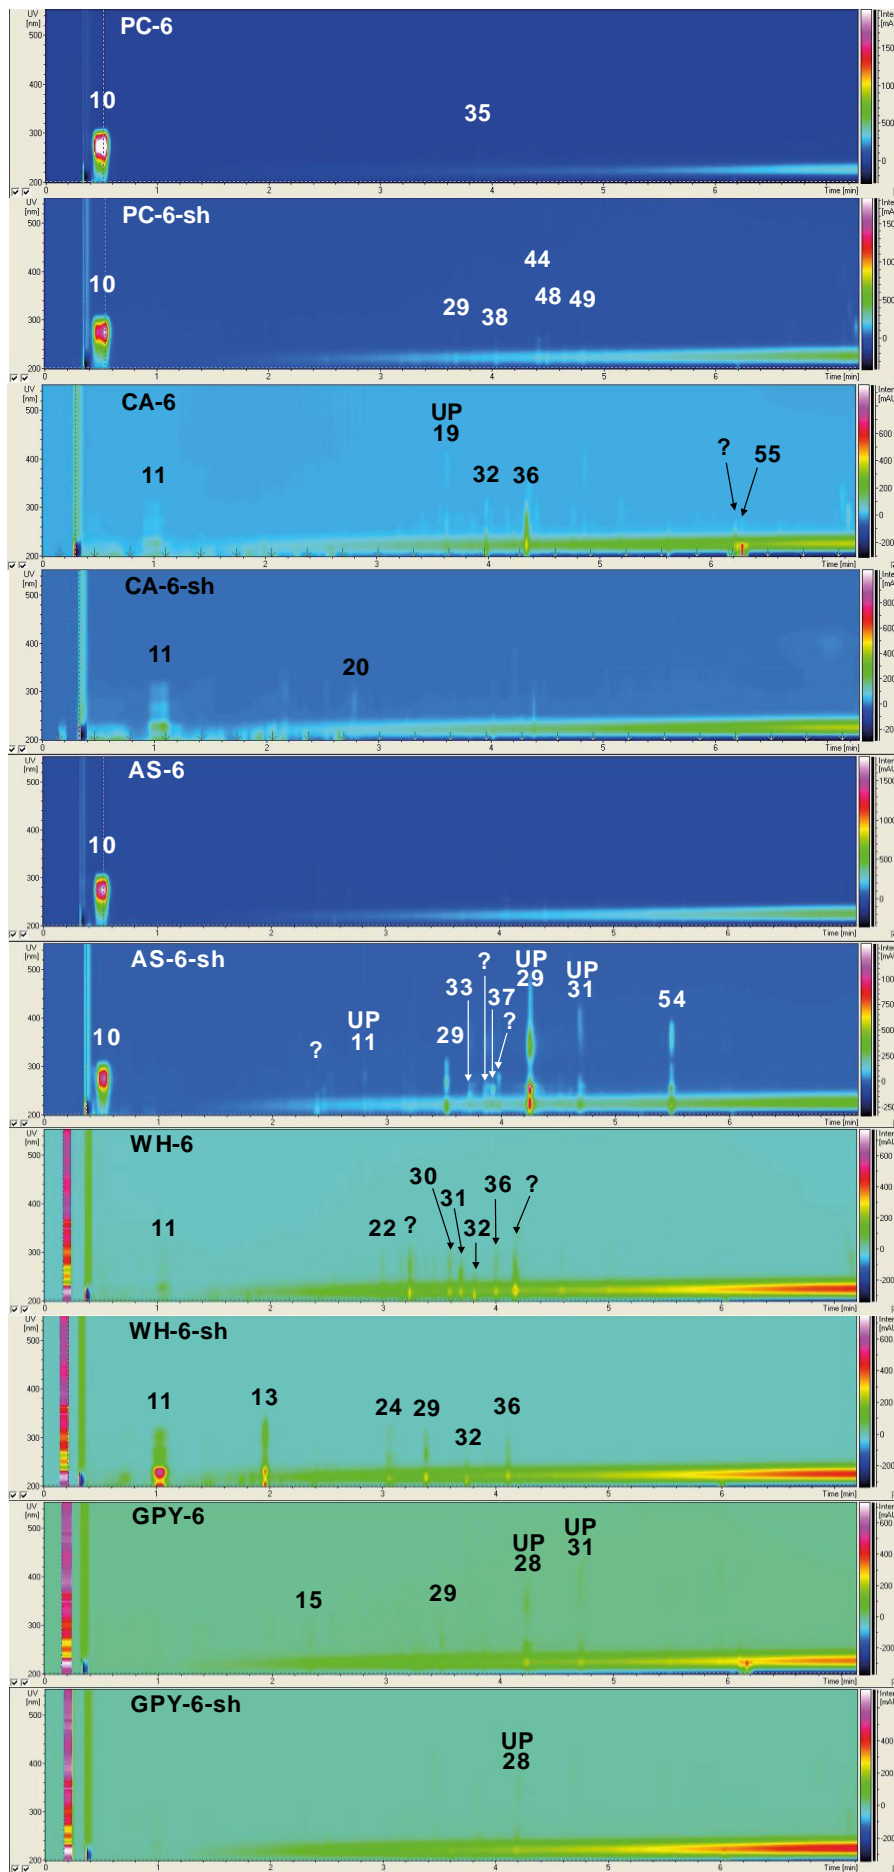

**Figure S6.** Metabolite profile of strain 6 (*P. antarcticum*) cultured under static and shaking (sh) conditions in five different media.

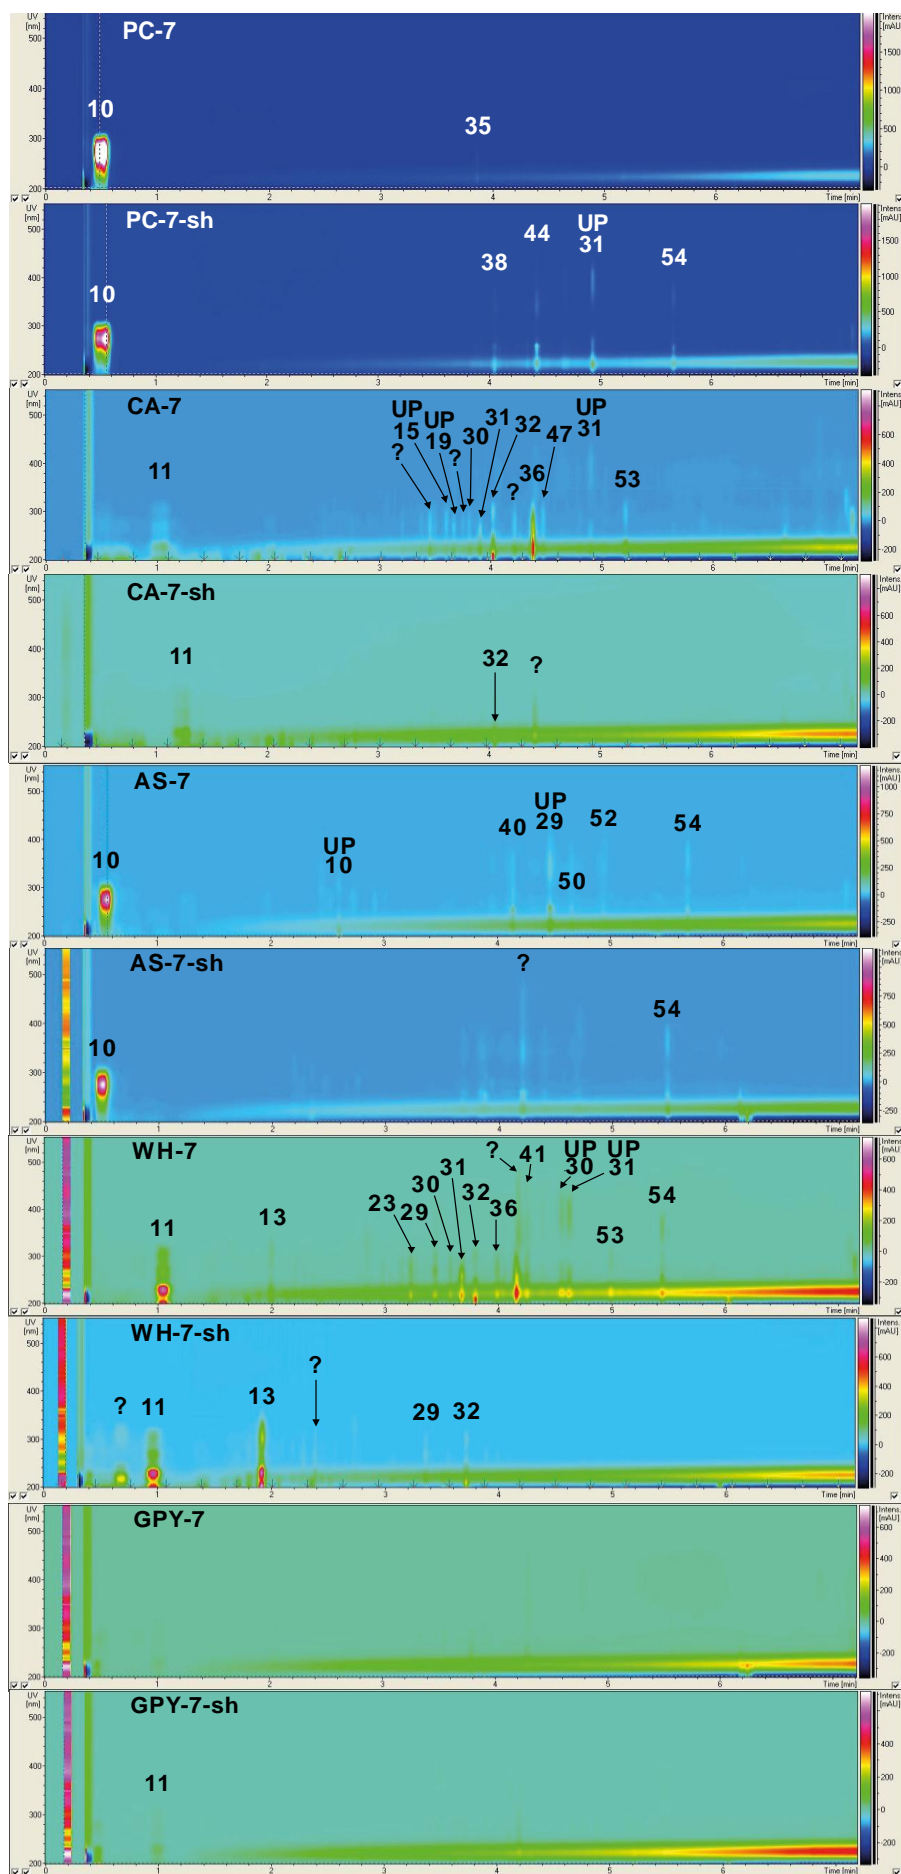

**Figure S7.** Metabolite profile of strain 7 (*P. antarcticum*) cultured under static and shaking (sh) conditions in five different media.



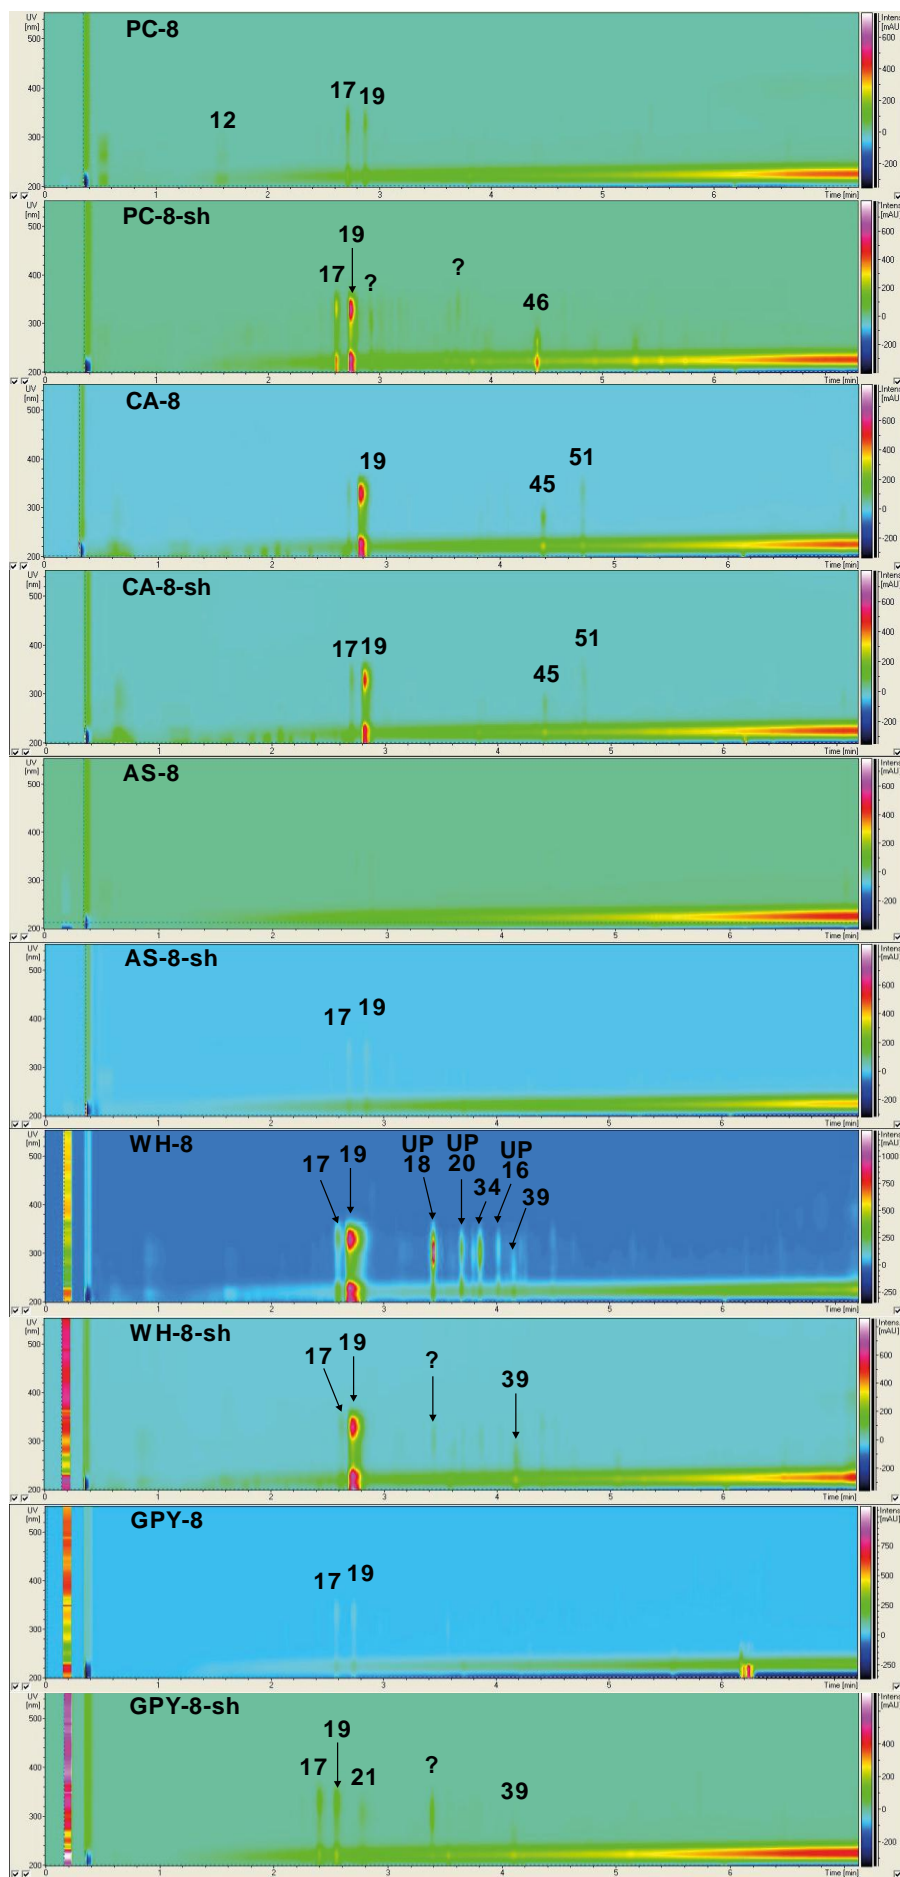

**Figure S8.** Metabolite profile of strain 8 (*P. atramentosum*) cultured under static and shaking (sh) conditions in five different media.

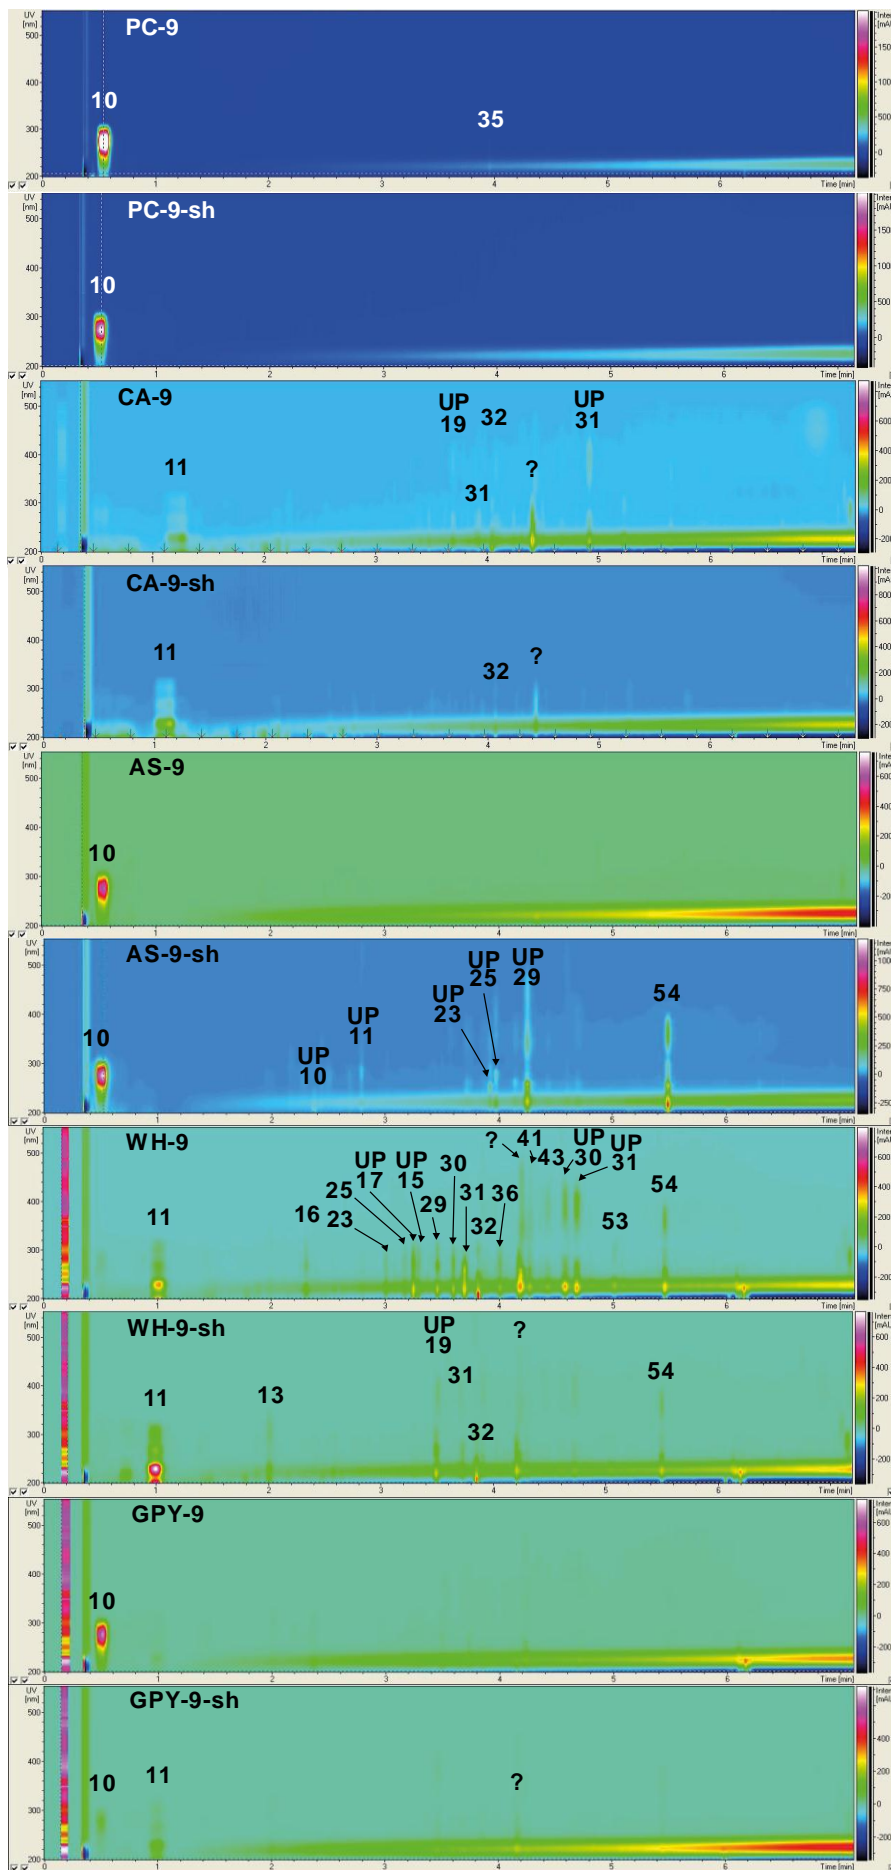

**Figure S9.** Metabolite profile of strain 9 (*P. atrovenerum*) cultured under static and shaking (sh) conditions in five different media.

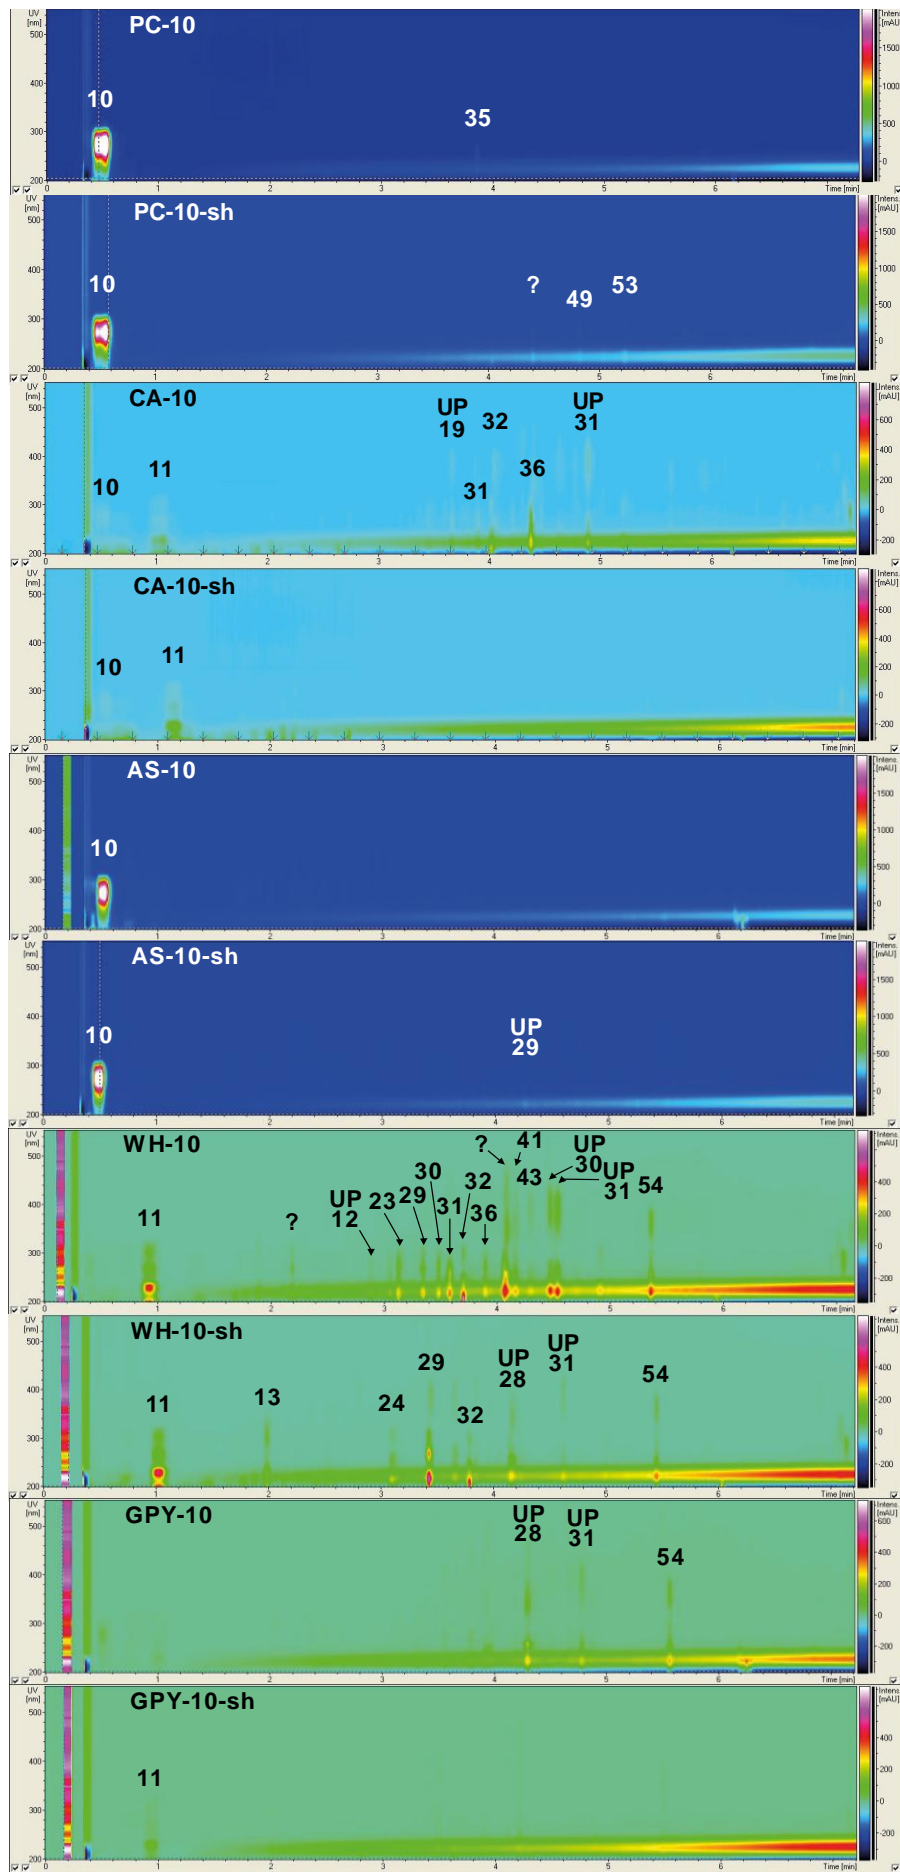

**Figure S10.** Metabolite profile of strain 10 (*P. atrovenerum*) cultured under static and shaking (sh) conditions in five different media.

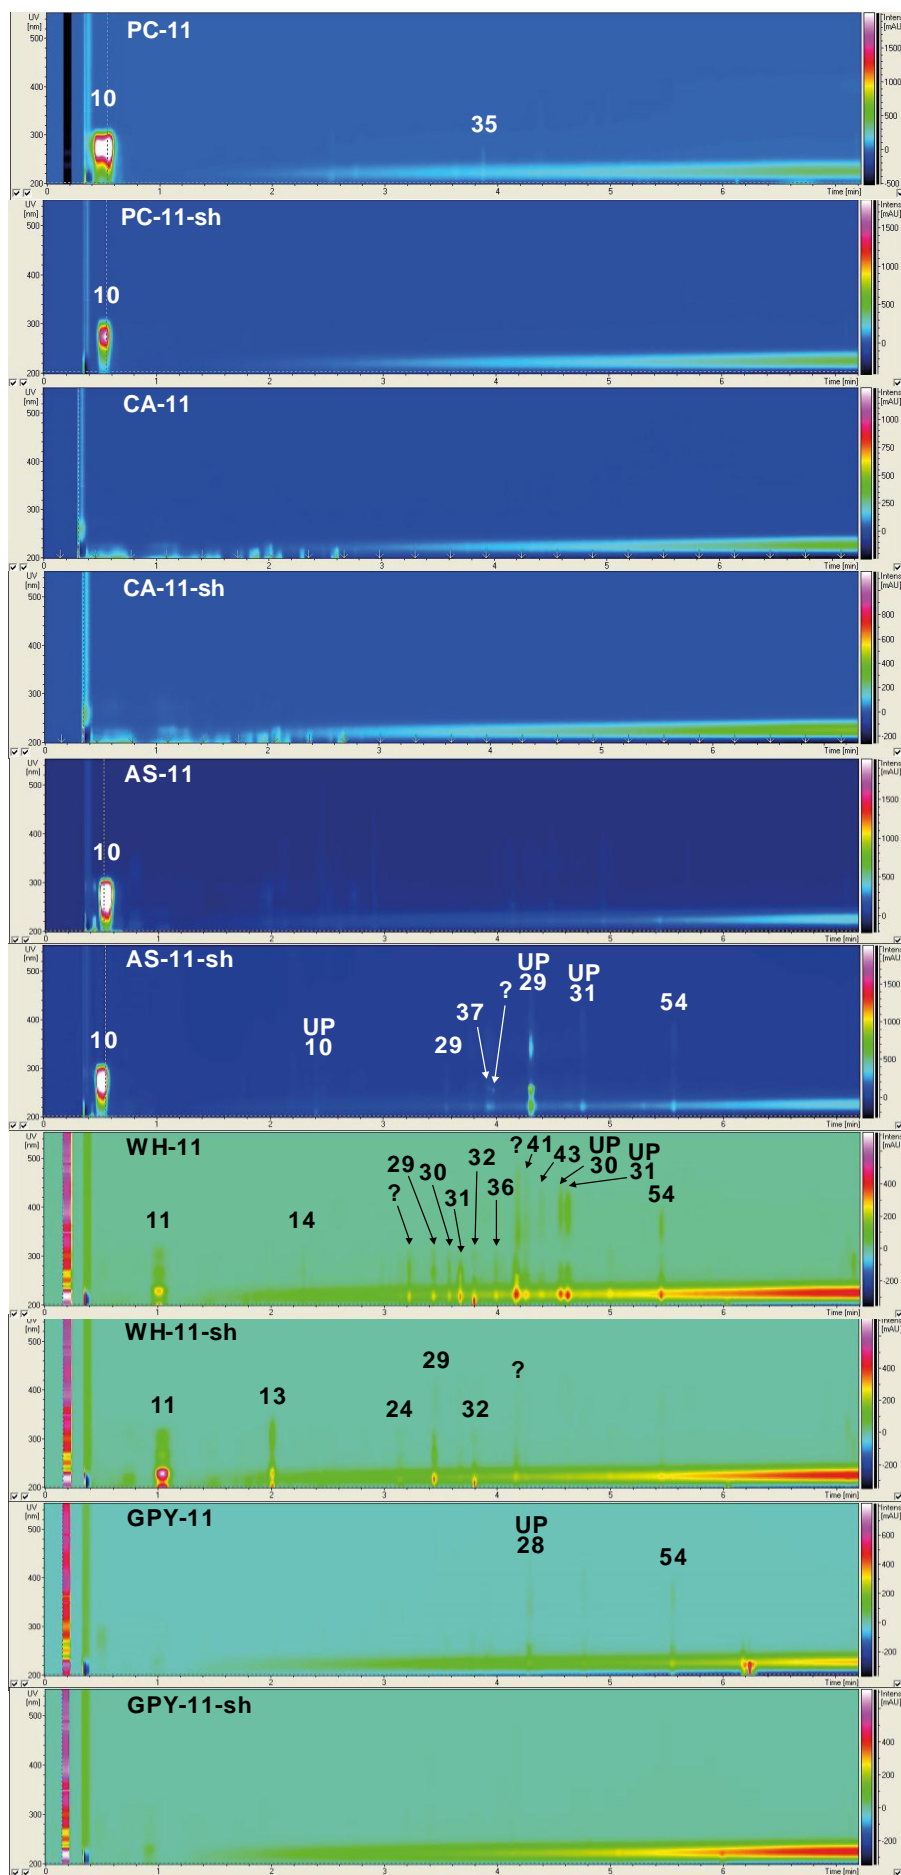

**Figure S11.** Metabolite profile of strain 11 (*P. atrovenerum*) cultured under static and shaking (sh) conditions in five different media.

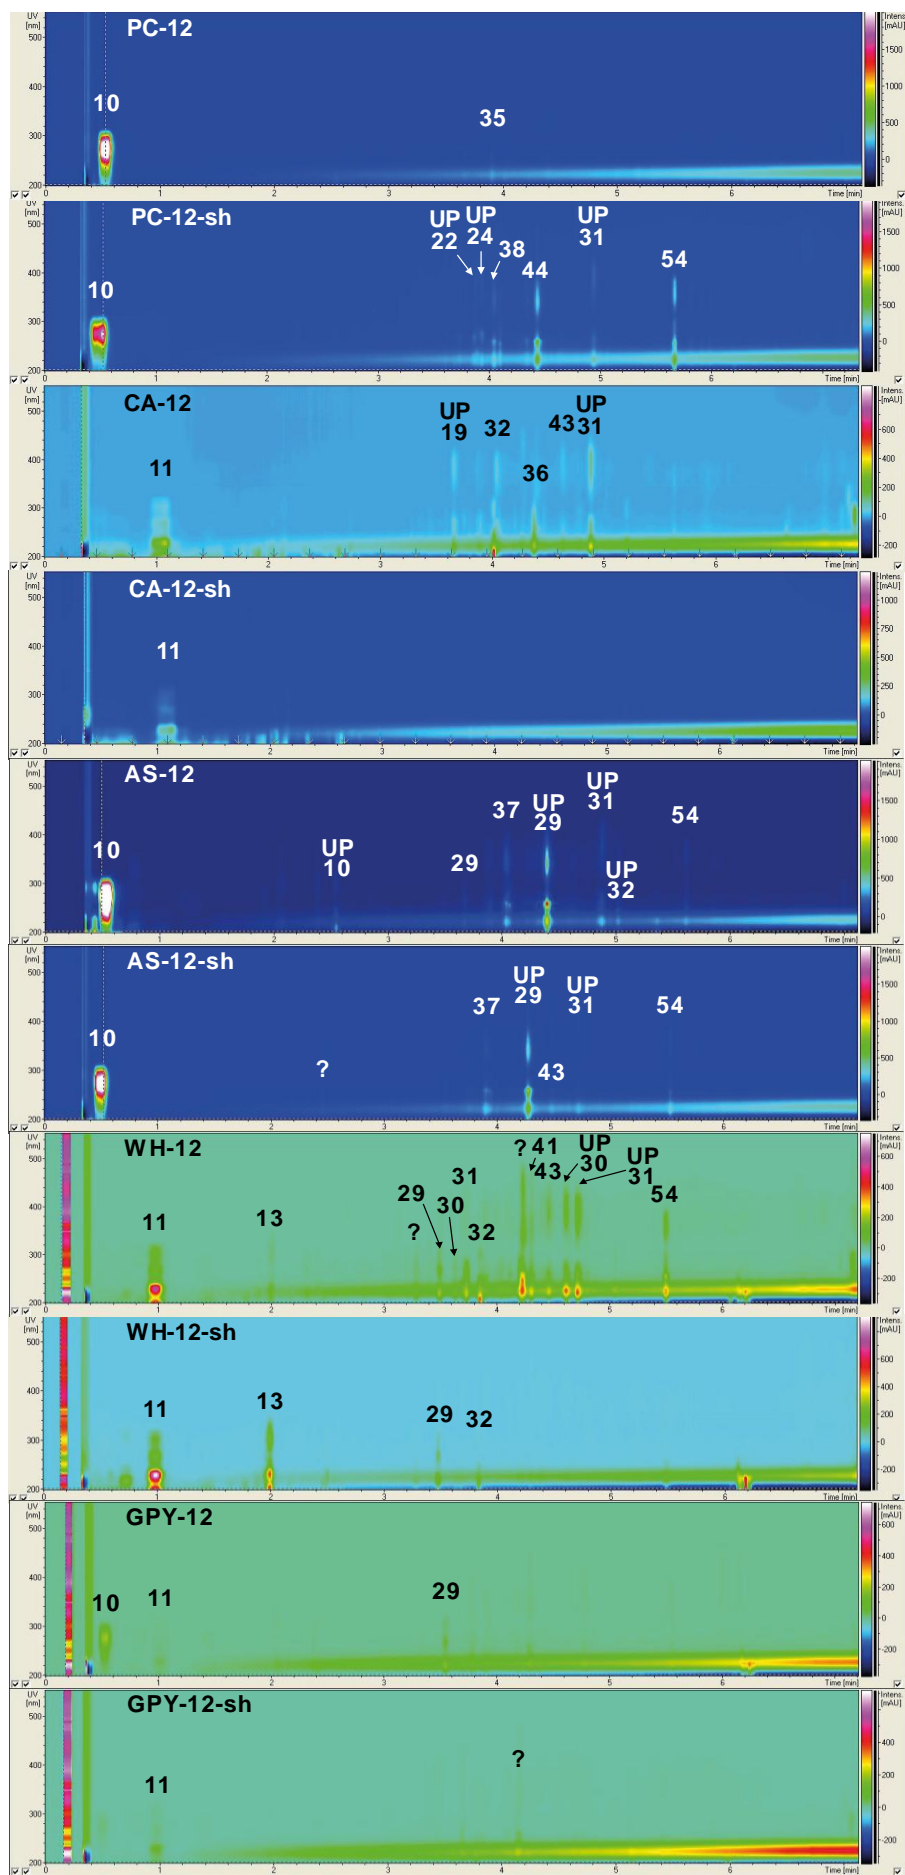

Figure S12. Metabolite profile of strain 12 (*P. atrovenerum*) cultured under static and shaking (sh) conditions in five different media.

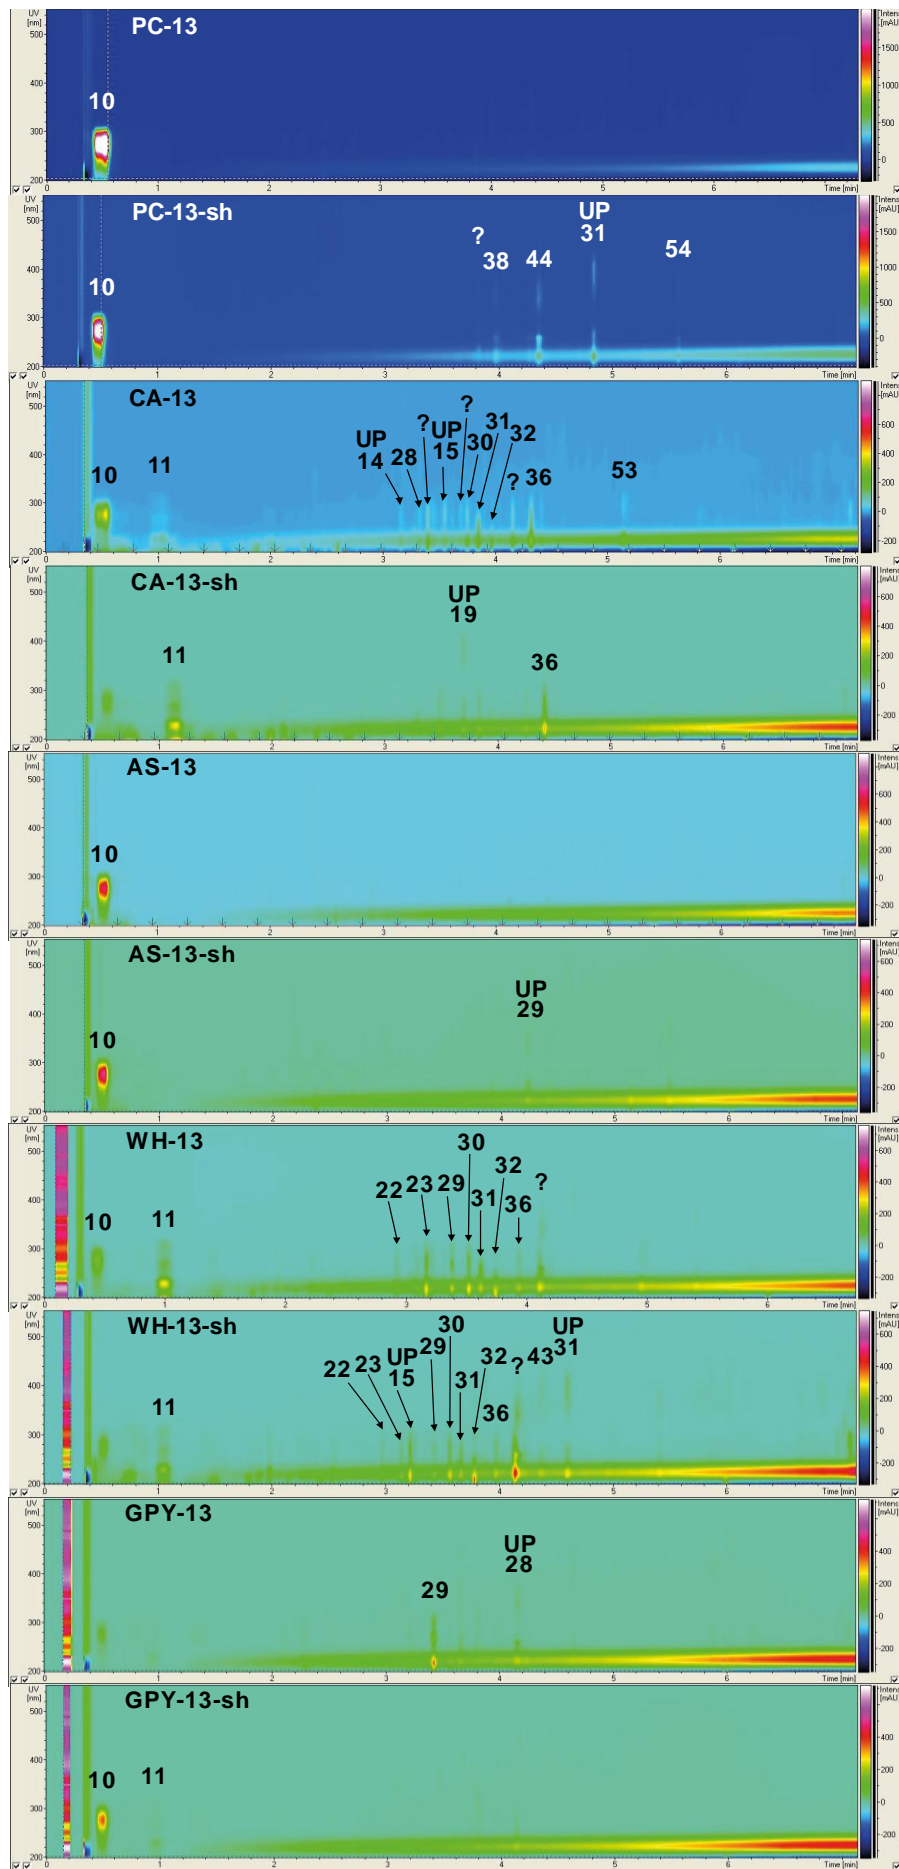

**Figure S13.** Metabolite profile of strain 13 (*P. atrovenerum*) cultured under static and shaking (sh) conditions in five different media.

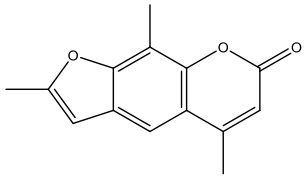

**1**

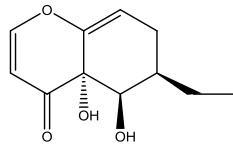

**3**

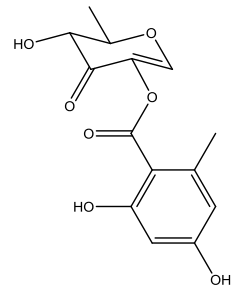

**4**

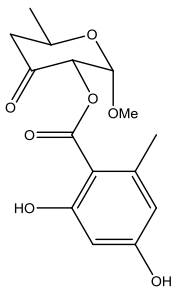

**5**

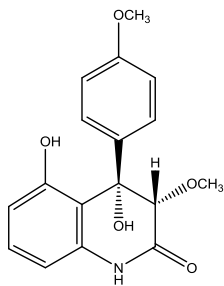

**7**

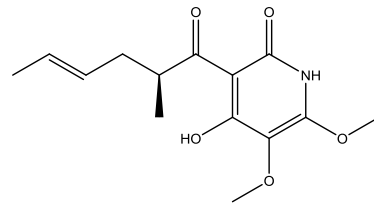

**8**

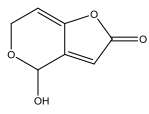

10

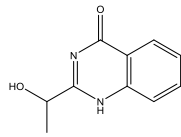

11

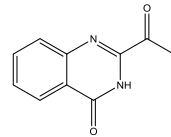

13

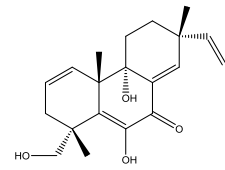

14

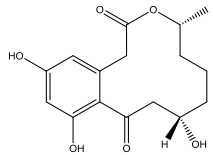

15

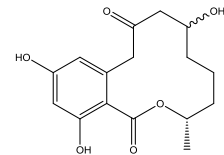

16

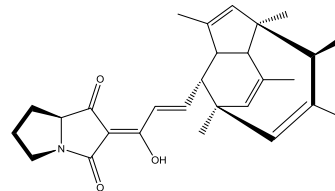

17

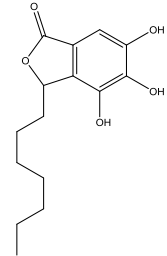

18

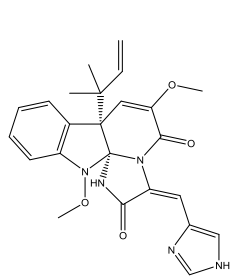

19

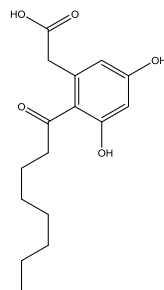

20

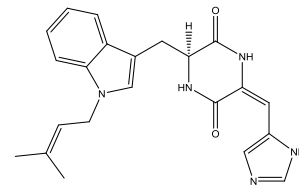

21

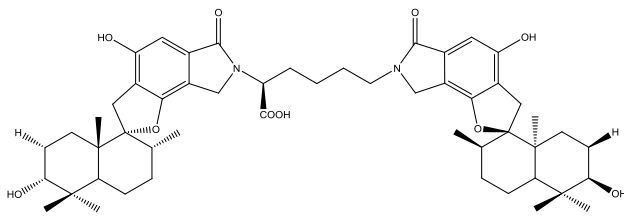

22

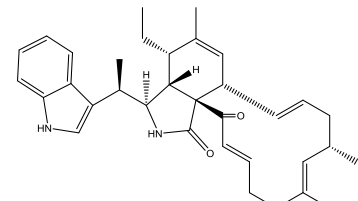

23

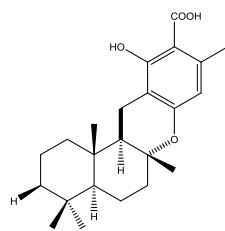

24

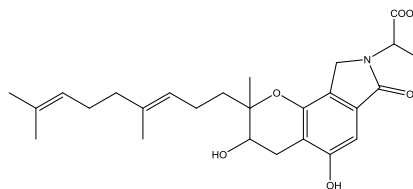

25

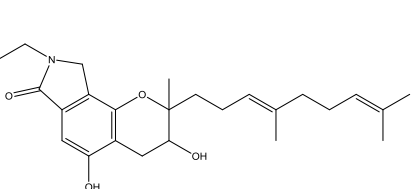



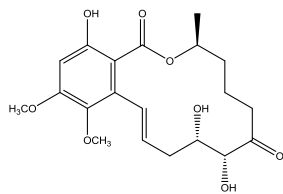

26

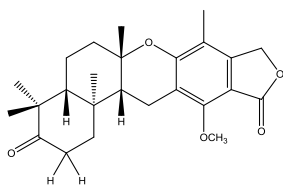

27

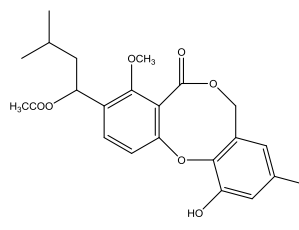

28

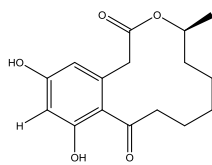

29

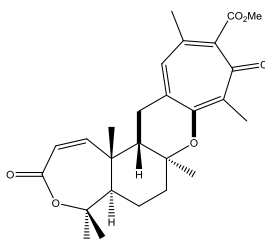

31

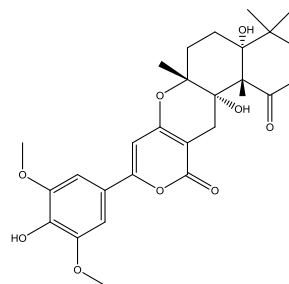

33

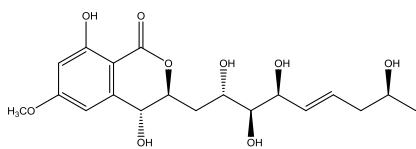

34

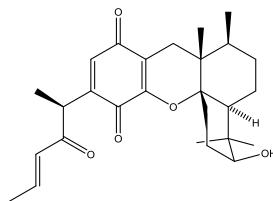

35

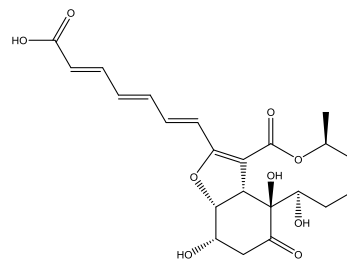

36

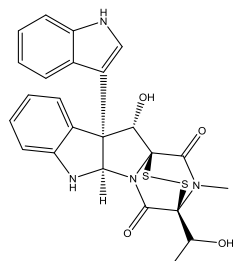

37

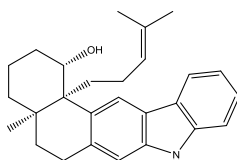

38a

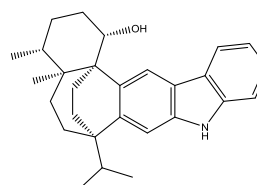

38b

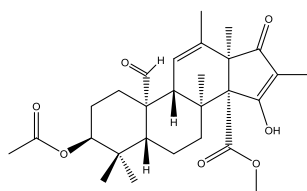

39

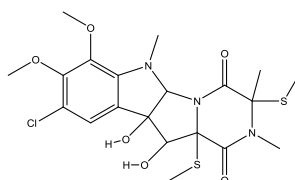

41

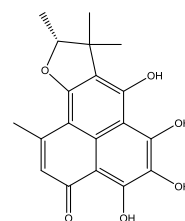

43

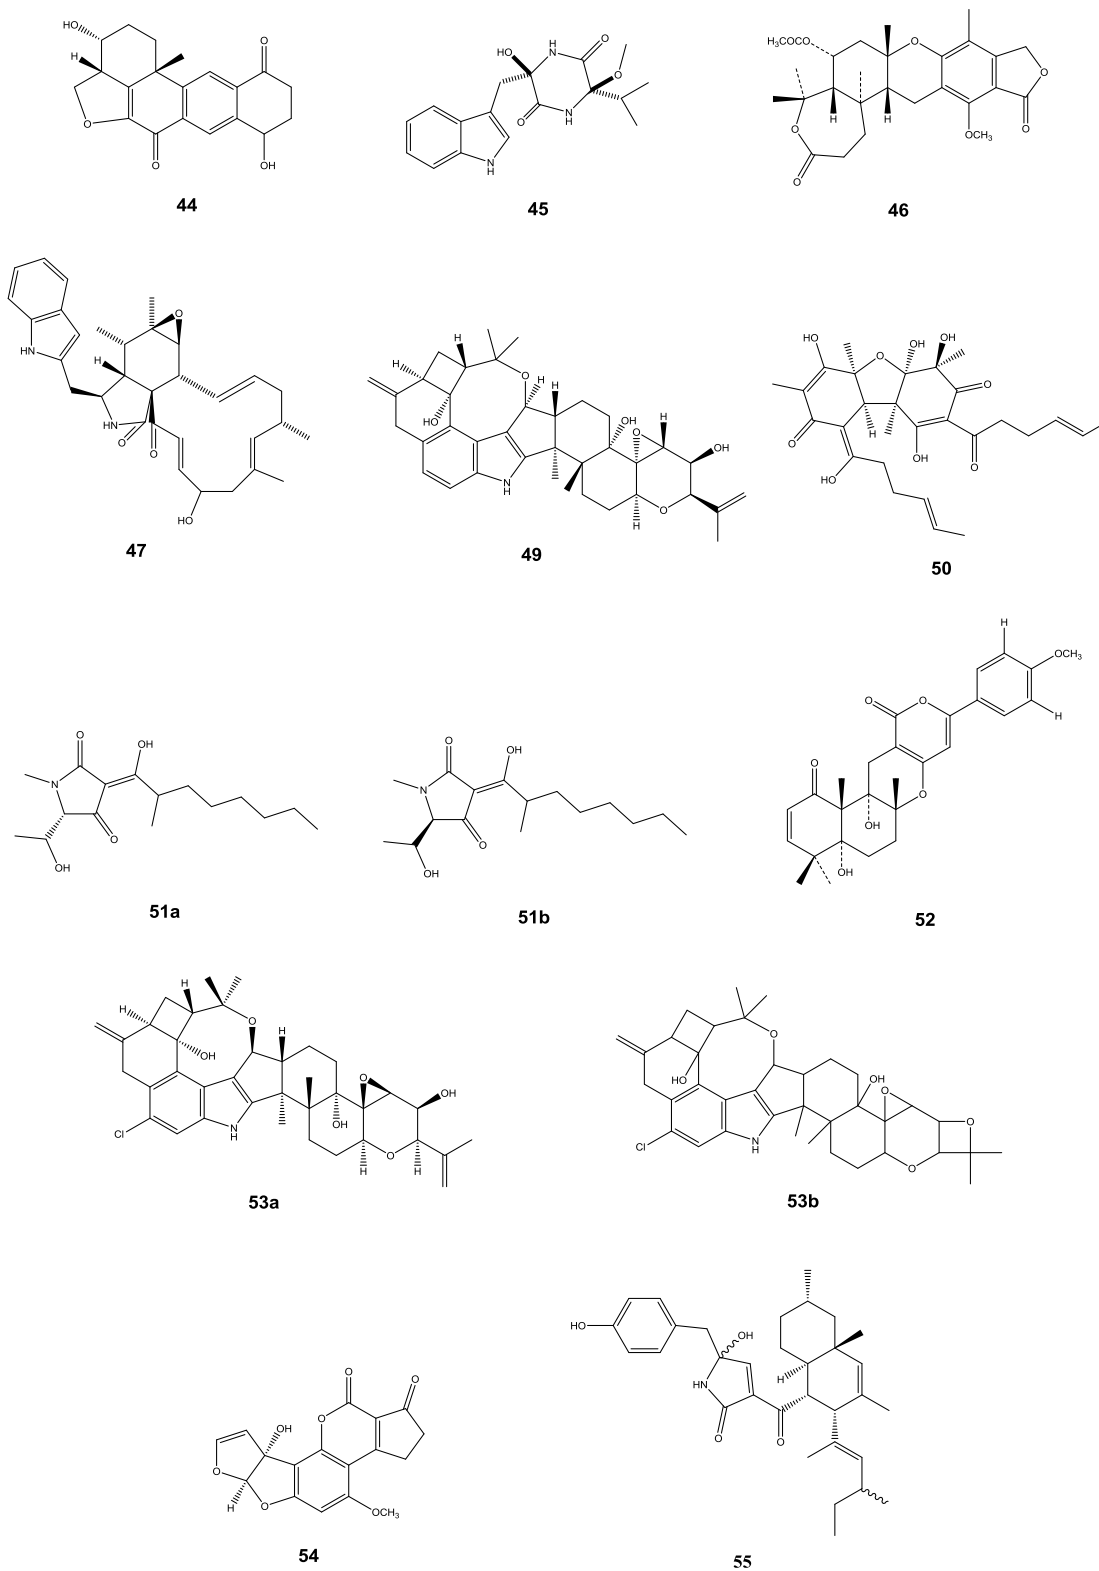

**Figure S14.** Chemical structures of dereplicated compounds in Table S1 (below). 38a: tubingensin A; 38b: tubingensin B; 51a: penicillenol A1; 51b: penicillenol A1; 53a: penitrem A; 53b: pennigritrem

**Table S1.** Spectral data used for dereplication of all *Penicillium spp.* (strains 4-13) extracts. n.d.: not detectable, n.i.: not identified, UP: unknown peak.

| Peak No. | ~ UV <sub>max</sub> (nm) | Mass [H] <sup>+</sup> | Dereplication                                  | Produced by strain            | Produced in media                                       |
|----------|--------------------------|-----------------------|------------------------------------------------|-------------------------------|---------------------------------------------------------|
| 10       | 275                      | 155.0                 | Patulin [1]                                    | 4, 5, 6, 7, 9, 10, 11, 12, 13 | PC, PC-sh, CA, CA-sh, AS, AS-sh, WH, WH-sh, GPY, GPY-sh |
| 11       | 228, 267, 292, 313       | 191.0                 | Chrysogine, (S)-form [2]                       | 6, 7, 9, 10, 11, 12, 13       | CA, CA-sh, WH, WH-sh, GPY, GPY-sh                       |
| 12       | 215, 260, 298            | 269.1                 | Globosumone B [3]                              | 8                             | PC                                                      |
| 13       | 204, 230, 303            | 189.0                 | 2-Acetyl-4(3H)-quinazolinone [4]               | 6, 7, 9, 10, 11, 12           | WH, WH-sh                                               |
| 14       | 216, 267, 299            | 331.1                 | Libertellenone B [5]                           | 11                            | WH                                                      |
| 15       | 218, 267, 300            | 309.1                 | Curvularin, (S)-form, 11 $\alpha$ -Hydroxy [6] | 4, 5, 6, 13                   | GPY                                                     |
| 16       | 216, 268, 300            | 309.1                 | 7,8-Dihydro-7 $\alpha$ -hydroxyresorcylide [7] | 9                             | WH                                                      |
| 17       | 223, 330, 345            | 434.1                 | PF 1018 [8]                                    | 8                             | PC, PC-sh, AS-sh, WH, WH-sh, GPY, GPY-sh                |
| 18       | 220, 269, 350            | 281.0                 | Cytosporone E [9]                              | 4                             | PC-sh                                                   |
| 19       | 224, 279, 327, 342       | 448.2                 | Oxaline [10]                                   | 8                             | PC, PC-sh, CA, CA-sh, AS-sh, WH, WH-sh, GPY, GPY-sh     |
| 20       | 220, 276                 | 295.1                 | Cytosporone A [9]                              | 6                             | CA, CA-sh                                               |
| 21       | 220, 304                 | 390.2                 | Tryhistatin [11]                               | 8                             | GPY-sh                                                  |

---

|    |                    |       |                             |                               |                           |
|----|--------------------|-------|-----------------------------|-------------------------------|---------------------------|
| 22 | 222, 273           | 883.4 | Stachylocin A [12]          | 4, 5, 6, 13                   | WH, WH-sh                 |
| 23 | 220, 270           | 511.3 | Chaetoglobosin 510 [13]     | 5, 7, 9, 10, 13               | CA, WH, WH-sh             |
| 24 | 215, 257, 305      | 373.1 | Hongoquercin A [14]         | 6, 10, 11                     | WH-sh                     |
| 25 | 221, 260, 279      | 883.4 | Antibiotic SMTP 8 [15]      | 9                             | WH                        |
| 26 | 215, 263, 279, 298 | 395.2 | Hamigeromycin D [16]        | 5                             | WH-sh                     |
| 27 | 220, 268, 280, 298 | 413.2 | Austalide K [17]            | 5                             | WH-sh                     |
| 28 | 221, 273, 368      | 415.3 | Purpactin A [18]            | 13                            | CA                        |
| 29 | 217, 267, 300      | 293.1 | Curvularin, (S)-form [19]   | 4, 5, 6, 11, 12               | AS, AS-sh, WH, WH-sh, GPY |
| 30 | 220, 275           | 437.2 | 3-O-Methylterpenin          | 4, 5, 6, 7, 9, 10, 11, 12, 13 | CA, CA-sh, WH, WH-sh      |
| 31 | 219, 259           | 441.2 | Tropolactone C [20]         | 4, 5, 6, 7, 9, 10, 11, 12, 13 | CA, CA-sh, WH, WH-sh, GPY |
| 32 | 208, 220, 300      | 402.2 | * see full name as footnote | 6, 7, 9, 10, 11, 12, 13       | CA, CA-sh, WH, WH-sh      |
| 33 | 221, 243, 261, 354 | 513.2 | Territrem C [21]            | 5, 6                          | AS-sh                     |
| 34 | 220, 300           | 399.2 | Aigialomycin F [22]         | 8                             | WH                        |
| 35 | 222, 258           | 441.2 | Podosporin A [23]           | 6, 7, 9, 10, 11, 12           | PC                        |

---

|    |                    |       |                                        |                               |                      |
|----|--------------------|-------|----------------------------------------|-------------------------------|----------------------|
| 36 | 220, 271           | 435.2 | Dictyosphaeric acid B [24]             | 4, 5, 6, 7, 9, 10, 11, 12, 13 | CA, CA-sh, WH, WH-sh |
| 37 | 220, 256, 288, 340 | 495.1 | Bionectin B [25]                       | 6, 11, 12                     | AS, AS-sh            |
| 38 | 219, 259, 341      | 402.2 | Tubingensin A or B [26, 27]            | 6, 7, 12, 13                  | PC-sh                |
| 39 | 220, 262, 290      | 487.2 | Andrastin A [28]                       | 4, 8                          | WH, WH-sh, GPY-sh    |
| 40 | 220, 255, 288, 338 | 647.1 | Orbuticin [29]                         | 7                             | AS                   |
| 41 | 260, 295, 348, 375 | 504.1 | Sporidesmin D [30]                     | 7, 9, 10, 11, 12              | WH                   |
| 42 | 225, 258, 280, 340 | 487.2 | Antibiotic UK 88051 [31]               | 5                             | WH                   |
| 43 | 222, 260, 388      | 343.1 | Atrovenetin [32]                       | 9, 10, 11, 12, 13             | CA, AS-sh, WH, WH-sh |
| 44 | 222, 250, 259, 340 | 341.2 | Tetrahydrohalenaquinone A [33]         | 6, 7, 12, 13                  | PC-sh                |
| 45 | 222, 279           | 332.2 | Polanrazine E [34]                     | 8                             | CA, CA-sh            |
| 46 | 220, 261           | 487.0 | Austalide I [17]                       | 8                             | PC-sh                |
| 47 | 223, 260, 288      | 515.3 | 20-Dihydroprotochaetoglobosin III [35] | 7                             | CA                   |
| 48 | 221, 261, 300      | 307.2 | Antibiotic PO1                         | 6                             | PC-sh                |
| 49 | 223, 288, 347      | 600.4 | Penitrem E [36]                        | 4, 5, 6, 10                   | PC-sh, CA, WH        |

---

|       |                    |       |                                                    |                            |                                  |
|-------|--------------------|-------|----------------------------------------------------|----------------------------|----------------------------------|
| 50    | 222, 260, 340      | 517.1 | 2',2'',3',3''-Tetrahydrobisvertinolone [37]        | 7                          | AS                               |
| 51    | 222, 269, 334      | 298.1 | Penicillenol A <sub>1</sub> or A <sub>2</sub> [38] | 8                          | CA, CA-sh                        |
| 52    | 222, 259, 343      | 467.1 | Arisugacin B [39]                                  | 7                          | AS                               |
| 53    | 225, 296, 347      | 634.2 | Penitrem A or Pennigritrem [40]                    | 7, 9, 10, 13               | PC-sh, CA                        |
| 54    | 255, 297, 356, 380 | 329.1 | Aflatoxin M1 [41]                                  | 5, 6, 7, 9, 10, 11, 12, 13 | PC-sh, AS, AS-sh, WH, WH-sh, GPY |
| 55    | <200, 221, 267     | 506.6 | Talaroconvolutin B [42]                            | 6                          | CA                               |
| UP 10 | 210, 242, 305      | 135.0 | n.h.                                               | 7, 9, 11, 12               | AS, AS-sh                        |
| UP 11 | 220, 278, 286      | 317.1 | n.h.                                               | 6, 9                       | AS-sh                            |
| UP 12 | 220, 270           | 535.3 | n.h.                                               | 10                         | WH                               |
| UP 13 | 222, 272           | 883.4 | n.h.                                               | 5                          | WH, WH-sh                        |
| UP 14 | 220, 271           | 472.2 | n.h.                                               | 13                         | CA                               |
| UP 15 | 219, 272           | 453.2 | n.h.                                               | 4, 5, 7, 9, 13             | CA, CA-sh, WH, WH-sh             |
| UP 16 | 223, 309, 361      | 365.2 | n.h.                                               | 8                          | WH                               |
| UP 17 | 216, 274           | 395.2 | n.h.                                               | 9                          | WH                               |

---

---

|       |                    |       |      |                               |                                      |
|-------|--------------------|-------|------|-------------------------------|--------------------------------------|
| UP 18 | 218, 300, 360      | 851.4 | n.h. | 8                             | WH                                   |
| UP 19 | 220, 268, 355, 385 | 516.2 | n.h. | 5, 6, 7, 9, 10, 12, 13        | CA, CA-sh, WH-sh                     |
| UP 20 | 224, 240, 308      | 383.3 | n.h. | 8                             | WH                                   |
| UP 21 | 222, 297           | 402.2 | n.h. | 5                             | WH                                   |
| UP 22 | 222, 267, 350      | 421.2 | n.h. | 12                            | PC-sh                                |
| UP 23 | 220, 255, 288, 340 | 313.1 | n.h. | 9                             | AS-sh                                |
| UP 24 | 221, 274, 355, 395 | 485.2 | n.h. | 12                            | PC-sh                                |
| UP 25 | 216, 277, 358      | 301.1 | n.h. | 9                             | AS-sh                                |
| UP 26 | 220, 291, 364, 425 | 365.2 | n.h. | 5                             | AS-sh                                |
| UP 27 | 222, 276           | 435.2 | n.h. | 5                             | CA, WH-sh                            |
| UP 28 | 222, 259, 340      | 341.1 | n.h. | 5, 6, 10, 11, 13              | WH-sh, GPY, GPY-sh                   |
| UP 29 | 222, 248, 259, 340 | 739.1 | n.h. | 4, 5, 6, 7, 9, 10, 11, 12, 13 | AS, AS-sh                            |
| UP 30 | 222, 263, 372, 405 | 504.1 | n.h. | 7, 9, 10, 11, 12              | WH                                   |
| UP 31 | 220, 260, 358, 404 | 357.2 | n.h. | 5, 6, 7, 9, 10, 11, 12, 13    | PC-sh, CA, AS, AS-sh, WH, WH-sh, GPY |

---

---

|       |                    |       |      |    |    |
|-------|--------------------|-------|------|----|----|
| UP 32 | 222, 245, 278, 344 | 389.1 | n.h. | 12 | AS |
|-------|--------------------|-------|------|----|----|

---

\* 4-Hydroxy-1-methoxy-5-phenyl-3 (tetrahydro-6-(3-hydroxy-1 methylpropyl)-3,5-dimethyl-2H-pyran-2-yl)-2(1H)-pyridinone



## Supplementary References

1. Monteillier, A.; Allard, P.-M.; Gindro, K.; Wolfender, J.-L.; Cuendet, M. Lung cancer chemopreventive activity of patulin isolated from *Penicillium vulpinum*. *Molecules* **2018**, *23*, 636, DOI: 10.3390/molecules23030636.
2. Hikino, H.; Nabetani, S.; Takemoto, T. Structure and biosynthesis of chrysogine, a metabolite of *Penicillium chrysogenum*. *Yakugaku Zasshi* **1973**, *93*, 619–623, DOI: 10.1248/yakushi1947.93.5\_619.
3. Bashyal, B.P.; Kithsiri Wijeratne, E.M.; Faeth, S.H.; Leslie Gunatilaka, A.A. Globosumones A-C, cytotoxic orsellinic acid esters from the Sonoran Desert endophytic fungus *Chaetomium globosum*. *J. Nat. Prod.* **2005**, *68*, 724–728, DOI: 10.1021/np058014b.
4. Tsantrizos, Y.S.; Xu, X.-J.; Sauriol, F.; Hynes, R.C. Novel quinazolinones and enniatins from *Fusarium lateritium* Nees. *Can. J. Chem.* **1993**, *71*, 1362–1367, DOI: 10.1139/v93-176.
5. Oh, D.-C.; Jensen, P.R.; Kauffman, C.A.; Fenical, W. Libertellenones A–D: induction of cytotoxic diterpenoid biosynthesis by marine microbial competition. *Bioorg. Med. Chem.* **2005**, *13*, 5267–5273, DOI: 10.1016/j.bmc.2005.05.068.
6. Greve, H.; Schupp, P.J.; Eguereva, E.; Kehraus, S.; Kelter, G.; Maier, A.; Fiebig, H.-H.; König, G.M. Apralactone A and a new stereochemical class of curvularins from the marine fungus *Curvularia* sp. *Eur. J. Org. Chem.* **2008**, 5085–5092, DOI: 10.1002/ejoc.200800522.
7. Küppers, L.; Ebrahim, W.; El-Neketi, M.; Özkaya, F.C.; Mándi, A.; Kurtán, T.; Orfali, R.S.; Müller, W.E.G.; Hartmann, R.; Lin, W.; et al. Lactones from the sponge-derived fungus *Talaromyces rugulosus*. *Mar. Drugs* **2017**, *15*, 359, DOI: 10.3390/md15110359.
8. Gomi, S.; Imamura, K.-i.; Yaguchi, T.; Kodama, Y.; Minowa, N.; Koyama, M. PF1018, a novel insecticidal compound produced by *Humicola* sp. *J. Antibiot.* **1994**, *47*, 571–580, DOI: 10.7164/antibiotics.47.571.
9. Brady, S.F.; Wagenaar, M.M.; Singh, M.P.; Janso, J.E.; Clardy, J. The cytosporones, new octaketide antibiotics isolated from an endophytic fungus. *Org. Lett.* **2000**, *2*, 4043–4046; DOI: 10.1021/ol006680s.
10. Koizumi, Y.; Arai, M.; Tomoda, H.; Ōmura, S. Oxaline, a fungal alkaloid, arrests the cell cycle in M phase by inhibition of tubulin polymerization. *Biochim. Biophys. Acta* **2004**, *1693*, 47–55, DOI: 10.1016/j.bbamcr.2004.04.013.
11. Shan, W.-G.; Ying, Y.-M.; Yu, H.-N.; Liu, W.-H.; Zhan, Z.-J. Diketopiperazine alkaloids from *Penicillium* spp. HS-3, an endophytic fungus in *Huperzia serrata*. *Helv. Chim. Acta* **2010**, *93*, 772–776, DOI: 10.1002/hlca.200900331.
12. Ogawa, K.; Nakamura, M.; Hayashi, M.; Yaginuma, S.; Yamamoto, S.; Furihata, K.; Shin-Ya, K.; Seto, H. Stachybocins, novel endothelin receptor antagonists, produced by *Stachybotrys* sp. M6222 – II. Structure determination of stachybocins A, B and C. *J. Antibiot.* **1995**, *48*, 1396–1400, DOI: 10.7164/antibiotics.48.1396.
13. Christian, O.E.; Compton, J.; Christian, K.R.; Mooberry, S.L.; Valeriote, F.A.; Crews, P. Using jasplakinolide to turn on pathways that enable the isolation of new chaetoglobosins from *Phomopsis asparagi*. *J. Nat. Prod.* **2005**, *68*, 1592–1597, DOI: 10.1021/np050293f.

14. Roll, D.M.; Manning, J.K; Carter, G.T. Hongoquercins A and B, new sesquiterpenoid antibiotics: isolation, structure elucidation, and antibacterial activity. *J. Antibiot.* **1998**, *51*, 635-639, DOI: 10.7164/antibiotics.51.635.
15. Hu, W.; Ohyama, S.; Hasumi, K. Activation of fibrinolysis by SMTP-7 and -8, novel staplabin analogs with a pseudosymmetric structure. *J. Antibiot.* **2000**, *53*, 241-247, DOI: 10.7164/antibiotics.53.241.
16. Isaka, M.; Chinthanom, P.; Kongthong, S.; Supothina, S.; Ittiworapong, P. Hamigeromycins C–G, 14-membered macrolides from the fungus *Hamigera avellanea* BCC 17816. *Tetrahedron* **2010**, *66*, 955-961, DOI: 10.1016/j.tet.2009.11.101.
17. Horak, R.M.; Steyn, P.S.; Vlegaar, R. Metabolites of *Aspergillus ustus*. Part 3. Structure elucidation of austalides G-L. *J. Chem. Soc. Perkin Trans. 1* **1985**, 363-367, DOI: 10.1039/P19850000363.
18. Nishida, H.; Tomoda, H.; Cao, J.; Okuda, S.; Ōmura, S. Purpactins, new inhibitors of acyl-CoA:cholesterol acyltransferase produced by *Penicillium purpurogenum* – II. Structure elucidation of purpactins A, B, and C. *J. Antibiot.* **1991**, *44*, 144-151, DOI: 10.7164/antibiotics.44.144.
19. Kobayashi, A.; Hino, T.; Yata, S.; Itoh, T.J.; Sato, H.; Kawazu, K. Unique spindle poisons, curvularin and its derivatives, isolated from *Penicillium* species. *Agric. Biol. Chem.* **1988**, *52*, 3119-3123, DOI: 10.1271/bbb1961.52.3119.
20. Cueto, M.; MacMillan, J.B.; Jensen, P.R.; Fenical, W. Tropolactones A–D, four meroterpenoids from a marine-derived fungus of the genus *Aspergillus*. *Phytochemistry* **2006**, *67*, 1826-1831, DOI: 10.1016/j.phytochem.2006.01.008.
21. Ling, K.H.; Liou, H.-H.; Yang, C.-M.; Yang, C.-K. Isolation, chemical structure, acute toxicity, and some physicochemical properties of territrem C from *Aspergillus terreus*. *Appl. Environ. Microbiol.* **1984**, *47*, 98-100.
22. Isaka, M.; Yangchum, A.; Intamas, S.; Kocharin, K.; Gareth Jones, E.B.; Kongsaree, P.; Prabpai, S. Aigialomycins and related polyketide metabolites from the mangrove fungus *Aigialus parvus* BCC 5311. *Tetrahedron* **2009**, *65*, 4396-4403, DOI: 10.1016/j.tet.2009.03.050.
23. Weber, H.A.; Baenziger, N.C.; Gloer, J.B. Podosporin A: a novel antifungal metabolite from the coprophilous fungus *Podospora decipiens* (Wint.) Niessl. *J. Org. Chem.* **1988**, *53*, 4567-4569, DOI: 10.1021/jo00254a028.
24. Bugni, T.S.; Janso, J.E.; Thomas Williamson, R.; Feng, X.; Bernan, V.S.; Greenstein, M.; Carter, G.T.; Maiese, W.M.; Ireland, C.M. Dictyosphaeric acids A and B: new decalactones from an undescribed *Penicillium* sp. obtained from the alga *Dictyosphaeria versluyii*. *J. Nat. Prod.* **2004**, *67*, 1396-1399, DOI: 10.1021/np049973t.
25. Zheng, C.-J.; Kim, C.-J.; Bae, K.S.; Kim, Y.-H.; Kim, W.-G. Bionectins A-C, epidithiodioxopiperazines with anti-MRSA activity, from *Bionectra byssicola* F120. *J. Nat. Prod.* **2006**, *69*, 1816-1819, DOI: 10.1021/np060348t.
26. TePaske, M.R.; Gloer, J.B.; Wicklow, D.T.; Dowd, P.F. Tubingensin A: an antiviral carbazole alkaloid from the sclerotia of *Aspergillus tubingensis*. *J. Org. Chem.* **1989a**, *54*, 4743-4746, DOI: 10.1021/jo00281a010.
27. TePaske, M.R.; Gloer, J.B. The structure of tubingensin B: a cytotoxic carbazole alkaloid from the sclerotia of *Aspergillus tubingensis*. *Tetrahedron Lett.* **1989b**, *30*, 5965-5968, DOI: 10.1016/S0040-4039(01)93829-8.

28. Shiomi, K.; Uchida, R.; Inokoshi, J.; Tanaka, H.; Iwai, Y.; Ōmura, S. Andrastins A-C, new protein farnesyltransferase inhibitors, produced by *Penicillium* sp. FO-3929. *Tetrahedron Lett.* **1996**, *37*, 1265-1268, DOI: 10.1016/0040-4039(95)02412-3.
29. Roy, K.; Chatterjee, S.; Deshmukh, S.K.; Vijayakumar, E.K.S.; Ganguli, B.N.; Fehlhaber, H.-W. Orbutecin, a new secondary metabolite from *Acremonium butyri*. *J. Antibiot.* **1996**, *49*, 1186-1187, DOI: 10.7164/antibiotics.49.1186.
30. Jamieson, W.D.; Rahman, R.; Taylor, A. Sporidesmins. Part VIII. Isolation and structure of sporidesmin-D and sporidesmin-F. *J. Chem. Soc. C* **1969**, *11*, 1564-1567, DOI: 10.1039/J39690001564.
31. Perry, D.A.; Maeda, H.; Tone, J. Anti-parasitic compound. *U.K. Patent Application* **1991**, 2 240 100.
32. Ishikawa, Y.; Morimoto, K.; Iseki, S. Atrovenetin as a potent antioxidant compound from *Penicillium* species. *J. Am. Oil Chem. Soc.* **1991**, *68*, 666-668, DOI: 10.1007/BF02662291.
33. Schmitz, F.J.; Bloor, S.J. Xesto- and halenaquinone derivatives from a sponge, *Adocia* sp., from Truk Lagoon<sup>1</sup>. *J. Org. Chem.* **1988**, *53*, 3922-3925, DOI: 10.1021/jo00252a007.
34. M.S.C.; Pedras, C.; Biesenthal, C.J. Isolation, structure determination, and phytotoxicity of unusual dioxopiperazines from the phytopathogenic fungus *Phoma lingam*. *Phytochemistry* **2001**, *58*, 905-909, DOI: 10.1016/S0031-9422(01)00348-X.
35. Oikawa, H.; Murakami, Y.; Ichihara, A. 20-ketoreductase activity of chaetoglobosin A and prochaetoglobosins in a cell-free system of *Chaetomium subaffine* and the isolation of new chaetoglobosins. *Biosci. Biotechnol. Biochem.* **1993**, *57*, 628-631, DOI: 10.1271/bbb.57.628.
36. Kyriakidis, N.; Waight, E.S.; Day, J.B.; Mantle, P.G. Novel metabolites from *Penicillium crustosum*, including penitrem E, a tremorgenic mycotoxin. *Appl. Environ. Microbiol.* **1981**, *42*, 61-62.
37. Liu, W.; Gu, Q.; Zhu, W.; Cui, C.; Fan, G. Two new benzoquinone derivatives and two new bisorbicillinoids were isolated from a marine-derived fungus *Penicillium terrestre*. *J. Antibiot.* **2005**, *58*, 441-446, DOI: 10.1038/ja.2005.57.
38. Lin, Z.-J.; Lu, Z.-Y.; Zhu, T.-J.; Fang, Y.-C.; Gu, Q.-Q.; Zhu, W.-M. Penicillenols from *Penicillium* sp. GQ-7, an endophytic fungus associated with *Aegiceras corniculatum*. *Chem. Pharm. Bull.* **2008**, *56*, 217-221, DOI: 10.1248/cpb.56.217.
39. Kuno, F.; Otaguro, K.; Shiomi, K.; Iwai, Y.; Ōmura, S. Arisugacins A and B, novel and selective acetylcholinesterase inhibitors from *Penicillium* sp. FO-4259 – I. Screening, taxonomy, fermentation, isolation and biological activity. *J. Antibiot.* **1996**, *49*, 742-747, DOI: 10.7164/antibiotics.49.742.
40. Penn, J.; Biddle, J.R.; Mantle, P.G.; Bilton, J.N.; Sheppard, R.N. Pennigritrem, a naturally-occurring penitrem A analogue with novel cyclisation in the diterpenoid moiety. *J. Chem. Soc. Perkin Trans. 1* **1992**, *1*, 23-26, DOI: 10.1039/P19920000023.
41. Kralj Cigić, I.; Prosen, H. An overview of conventional and emerging analytical methods for the determination of mycotoxins. *Int. J. Mol. Sci.* **2009**, *10*, 62-115, DOI: 10.3390/ijms10010062.
42. Suzuki, S.; Hosoe, T.; Nozawa, K.; Kawai, K.-i.; Yaguchi, T.; Udagawa, S.-i. Antifungal substances against pathogenic fungi, talaroconvolutins, from *Talaromyces convolutus*. *J. Nat. Prod.* **2000**, *63*, 768-772, DOI: 10.1021/np990371x.
